1 ***Common variants contribute to intrinsic functional architecture of human brain***

2

3 **Running title: GWAS of intrinsic brain function**

4

5 Bingxin Zhao<sup>1,14</sup>, Tengfei Li<sup>2,3,14</sup>, Stephen M. Smith<sup>4</sup>, Di Xiong<sup>1</sup>, Xifeng Wang<sup>1</sup>, Yue Yang<sup>1</sup>,  
6 Tianyou Luo<sup>1</sup>, Ziliang Zhu<sup>1</sup>, Yue Shan<sup>1</sup>, Mads E. Hauberg<sup>5,6,8,9</sup>, Jaroslav Bendl<sup>5-7</sup>, John F.  
7 Fullard<sup>5-7</sup>, Panagiotis Roussos<sup>5-7,10</sup>, Weili Lin<sup>2,3</sup>, Yun Li<sup>1,11,12</sup>, Jason L. Stein<sup>11,13</sup>, and Hongtu  
8 Zhu<sup>1,3\*</sup>

9

10 <sup>1</sup>Department of Biostatistics, University of North Carolina at Chapel Hill, Chapel Hill, NC, USA

11 <sup>2</sup>Department of Radiology, University of North Carolina at Chapel Hill, Chapel Hill, NC, USA

12 <sup>3</sup>Biomedical Research Imaging Center, School of Medicine, University of North Carolina at Chapel Hill,  
13 Chapel Hill, NC, USA

14 <sup>4</sup>Wellcome Centre for Integrative Neuroimaging, FMRIB, Nuffield Department of Clinical  
15 Neurosciences, University of Oxford, Oxford, UK

16 <sup>5</sup>Department of Psychiatry, Icahn School of Medicine at Mount Sinai, New York, NY, USA

17 <sup>6</sup>Friedman Brain Institute, Icahn School of Medicine at Mount Sinai, New York, NY, USA

18 <sup>7</sup>Department of Genetics and Genomic Science and Institute for Multiscale Biology, Icahn School of  
19 Medicine at Mount Sinai, New York, NY, USA

20 <sup>8</sup>iPSYCH, The Lundbeck Foundation Initiative for Integrative Psychiatric Research, Denmark

21 <sup>9</sup>Centre for Integrative Sequencing (iSEQ), Aarhus University, Aarhus, Denmark

22 <sup>10</sup>Mental Illness Research, Education, and Clinical Center (VISN 2 South), James J. Peters VA Medical  
23 Center, Bronx, NY, USA

24 <sup>11</sup>Department of Genetics, University of North Carolina at Chapel Hill, Chapel Hill, NC, USA

25 <sup>12</sup>Department of Computer Science, University of North Carolina at Chapel Hill, Chapel Hill, NC, USA

26 <sup>13</sup>UNC Neuroscience Center, University of North Carolina at Chapel Hill, Chapel Hill, NC, USA

27 <sup>14</sup>These authors contributed equally to this work.

28

29 ***\*Corresponding author:***

30 Hongtu Zhu

31 3105C McGavran-Greenberg Hall, 135 Dauer Drive, Chapel Hill, NC 27599.

32 E-mail address: [htzhu@email.unc.edu](mailto:htzhu@email.unc.edu) Phone: (919) 966-7250

## 1 **Abstract**

2 Human brain has a complex functional architecture and remains active during resting  
3 conditions. Resting-state functional magnetic resonance imaging (rsfMRI) measures  
4 brain activity at rest, which is closely linked with cognition and clinical outcomes. The  
5 role of genetics in human brain function is largely unknown. Here we utilized rsfMRI of  
6 44,190 multi-ethnic individuals (37,339 in the UK Biobank) to discover the common  
7 genetic variants influencing intrinsic brain activity. We identified and validated hundreds  
8 of novel genetic loci associated with intrinsic functional signatures ( $P < 2.8 \times 10^{-11}$ ),  
9 especially for interactions of the central executive, default mode, and salience networks  
10 involved in the triple network model of psychopathology. A number of intrinsic brain  
11 activity associated loci had been implicated with brain disorders (e.g., Alzheimer's  
12 disease, Parkinson's disease, schizophrenia) and cognition, such as 17q21.31, 19q13.32,  
13 and 2p16.1. Genetic correlation analysis suggested the shared genetic influences among  
14 intrinsic brain function, brain structure, and brain structural connectivity. We also  
15 detected significant genetic correlations with 26 other complex traits, such as  
16 education, cognitive performance, ADHD, major depressive disorder, schizophrenia,  
17 sleep, and neuroticism. Heritability of intrinsic brain activity was enriched in brain  
18 tissues. The reported risk genes of Alzheimer's disease typically had stronger  
19 associations with intrinsic brain activity than brain structure, and the associated genes  
20 of intrinsic brain activity were enriched in multiple biological pathways related to  
21 nervous system and neuropathology ( $P < 1.8 \times 10^{-9}$ ).

22

23 **Keywords:** Amplitude; Functional Connectivity; Intrinsic brain activity; GWAS;  
24 Resting-state fMRI; Triple network model; UK Biobank.

25

26

27

28

29

30

1 Human brain is a complex system exhibiting a wide variety of neural activity and  
2 connectivity patterns across brain regions<sup>1,2</sup>. Functional organization and  
3 communication of brain networks are fundamental to bodily behavior and cognitive  
4 architectures<sup>3-6</sup>. Human brain remains active at rest, resulting in an intrinsic functional  
5 architecture. Utilizing changes in blood oxygen level-dependent (BOLD) signal<sup>2,7</sup>,  
6 resting-state functional magnetic resonance imaging<sup>8</sup> (rsfMRI) can capture spontaneous  
7 intrinsic brain activity, or neuronal activity not attributable to a given task or stimulus<sup>9</sup>.  
8 Specifically, the spontaneous neuronal activity within each functional region can be  
9 quantified by the amplitude of low frequency fluctuations (ALFF) in BOLD time  
10 series<sup>2,10,11</sup>. Moreover, a functional connectivity matrix quantifying pairwise  
11 inter-regional correlations in spontaneous neuronal variability measures the magnitude  
12 of temporal synchrony between each pair of brain regions<sup>2,12</sup>.

13  
14 Several techniques have been developed to characterize functional brain regions and  
15 their interactions, such as seed-based analysis with prior knowledges<sup>2,13</sup>, data-driven  
16 independent component analysis<sup>14,15</sup> (ICA), and graph methods<sup>16</sup>. The intrinsic brain  
17 activity patterns revealed in rsfMRI illuminate functional architecture of human brain<sup>9</sup>.  
18 For example, rsfMRI yields many insights into the resting-state networks (RSNs) of a  
19 healthy brain, such as default mode, central executive (i.e., frontoparietal), attention,  
20 limbic, salience, somatomotor, and visual networks<sup>17-19</sup>. These RSNs are strongly linked  
21 functional sub-networks<sup>18,20</sup> that commonly emerge in rsfMRI studies, which are of  
22 great interest in studies of cognition<sup>21</sup>. In addition, rsfMRI and RSNs have a wide range  
23 of clinical applications to detect brain abnormality in neurological and psychiatric  
24 disorders<sup>13</sup>, such as Alzheimer's disease<sup>22</sup>, Parkinson's disease<sup>23</sup>, and major depressive  
25 disorder (MDD)<sup>24</sup>. Among these RSNs, the central executive, default mode, and salience  
26 networks are three core neurocognitive networks that support efficient cognition<sup>25-27</sup>.  
27 Accumulating evidence suggests that the functional organization and dynamic  
28 interaction of these three networks underlie a wide range of mental disorders, resulting  
29 in the triple network model of psychopathology<sup>26,28</sup>.

30  
31 Twin and family studies have largely reported a low to moderate degree of genetic  
32 contributions for intrinsic brain activity<sup>29-35</sup>. For example, the family-based heritability

1 estimates of major RSNs ranged from 20% to 40% in the Human Connectome Project  
2 (HCP)<sup>36</sup>. In a previous study using about 8,000 UK Biobank (UKB) individuals<sup>37</sup>, the SNP  
3 heritability<sup>38</sup> of amplitude and functional connectivity traits can be more than 30%.  
4 Although there were multiple candidate gene studies for intrinsic brain activity (such as  
5 for *APOE*<sup>39</sup> and *KIBRA*<sup>40</sup>), currently only one genome-wide association study (GWAS)<sup>37</sup>  
6 has been successfully performed on rsfMRI<sup>29</sup> ( $n \approx 8000$ ). This is mainly due to the fact  
7 that most rsfMRI datasets do not have enough participants for GWAS discovery and the  
8 overall genetic effects on neuronal activity are weaker compared to those on brain  
9 structure<sup>37,41-45</sup>. In addition, imaging batch effects<sup>46</sup> (e.g., image processing procedures,  
10 software) may cause substantial extra variability in rsfMRI analyses<sup>47</sup>, making GWAS  
11 meta-analysis and independent replication particularly challenging. Therefore, genetic  
12 variants influencing intrinsic brain activity remain largely undiscovered and their shared  
13 genetic influences with other complex traits and clinical outcomes are unknown.

14

15 To address these challenges, here we collected individual-level rsfMRI data from four  
16 independent studies: the UK Biobank<sup>48</sup>, Adolescent Brain Cognitive Development  
17 (ABCD<sup>49</sup>), Philadelphia Neurodevelopmental Cohort (PNC<sup>50</sup>), and HCP<sup>51</sup>. We harmonized  
18 rsfMRI processing procedures by following the unified UKB brain imaging pipeline<sup>10,52</sup>.  
19 Functional brain regions and corresponding functional connectivity were characterized  
20 via spatial ICA<sup>53,54</sup> for 44,190 multi-ethnic individuals, including 37,339 from UK Biobank.  
21 As in previous studies<sup>10,37,55</sup>, two parcellations with different dimensionalities<sup>18,56</sup> (25  
22 and 100 regions, respectively) were separately applied in spatial ICA and we focused on  
23 the 76 (21 and 55, respectively) regions that had been confirmed to be  
24 non-artefactual<sup>10</sup>. Two group of neuroimaging phenotypes were then generated: the  
25 first group contains 76 (node) amplitude traits reflecting the regional spontaneous  
26 neuronal activity; and the second group includes 1,695 (i.e.,  $21 \times 20/2 + 55 \times 54/2$ )  
27 (edge) functional connectivity traits that quantify the inter-regional co-activity, as well  
28 as 6 global functional connectivity measures summarizing all of the 1,695 pairwise  
29 functional connectivity traits<sup>37</sup>. These 1,777 traits were then used to explore the genetic  
30 architecture of intrinsic brain activity. To aid interpretation of GWAS results, the  
31 functional brain regions characterized in ICA were labelled by using the automated  
32 anatomical labeling atlas<sup>57</sup> and were mapped onto major RSNs defined in Yeo, et al. <sup>19</sup>

1 and Finn, et al.<sup>17</sup>. Our GWAS results can be easily explored and downloaded through the  
2 Brain Imaging Genetics Knowledge Portal (BIG-KP) <https://bigkp.web.unc.edu/>.

3

## 4 RESULTS

### 5 Genetics of the intrinsic brain functional architecture.

6 SNP heritability was estimated for the 1,777 intrinsic brain activity traits via GCTA<sup>58</sup>. The  
7 mean heritability ( $h^2$ ) estimate was 27.2% (range = (10%, 36.5%), standard error = 6.0%)  
8 for the 76 amplitude traits, all of which remained significant after adjusting for multiple  
9 comparisons by using the Benjamini-Hochberg procedure to control false discovery rate  
10 (FDR) at 0.05 level (1,777 tests, **Fig. 1a, Supplementary Table 1**). Among the 1,701  
11 functional connectivity traits, 1,230 had significant (again at 5% FDR) heritability with  
12 estimates varying from 3% to 61% (mean = 9.6%, standard error = 5.8%). Ten functional  
13 connectivity traits had heritability larger than 30%, including 6 pairwise functional  
14 connectivity traits and 4 global functional connectivity measures. These traits were most  
15 related to central executive, default mode, and salience networks in the triple network  
16 model of psychopathology<sup>26</sup>, indicating that the level of genetic control might be higher  
17 in these core neurocognitive networks (**Fig. 1b, Supplementary Fig. 1**). The range of  
18 heritability estimates was consistent with previous results<sup>37</sup>, suggesting that common  
19 genetic variants had a low to moderate degree of contributions to inter-individual  
20 variability of intrinsic brain activity. The overall genetic effects on both amplitude and  
21 functional connectivity were lower than those on brain structure. For example, the  
22 average heritability was reported to be 48.7% for diffusion tensor imaging (DTI) traits of  
23 brain structural connectivity in white matter tracts<sup>59</sup> and 40% for regional brain volumes  
24 measuring brain morphometry<sup>43</sup>. However, as shown below, intrinsic brain activity may  
25 have stronger genetic connections with some brain disorders than brain structure, such  
26 as the Alzheimer's disease.

27

28 Genome-wide association discovery was carried out for 1,777 intrinsic brain activity  
29 traits using UKB individuals of British ancestry ( $n = 34,691$ , Methods). The Manhattan  
30 and QQ plots can be found in the BIG-KP server. At the significance level  $2.8 \times 10^{-11}$  (i.e.,  
31  $5 \times 10^{-8}/1,777$ , adjusted for the 1,777 traits), we identified 328 independent significant  
32 variants (linkage disequilibrium [LD]  $r^2 < 0.2$ , Methods) involved in 987 variant-trait

1 associations for 197 traits (75 amplitude and 122 functional connectivity,  
2 **Supplementary Table 2**). The amplitude traits typically had multiple associated variants  
3 (**Supplementary Table 3**) and a number of variants were widely related to the amplitude  
4 in different brain regions, such as rs11187837 in the 10q23.33 genomic region,  
5 rs9899649 in 17p11.2, rs10781575 in 10q26.3, and rs429358 in 19q13.32. For functional  
6 connectivity, rs2279829 in 3q24, rs2863957 in 2q14.1, rs7650184 in 3p11.1, and  
7 rs34522 in 5q14.3 were associated with multiple functional connectivity traits. Pairwise  
8 functional connectivity traits that had multiple significant variants were again most  
9 related to central executive, default mode, and salience networks (**Fig. 2a**). Of the 14  
10 associated variants that had been identified in the previous GWAS<sup>37</sup>, 12 were in LD ( $r^2 \geq$   
11 0.6) with our significant variants, most of which were associated with amplitude traits.  
12 With a more strict LD threshold (LD  $r^2 < 0.1$ ), FUMA<sup>60</sup> selected 227 lead variants out of  
13 the 328 significant variants, and then characterized 604 significant locus-trait  
14 associations (Methods, **Fig. 2b, Supplementary Tables 4-5**). In summary, our analyses  
15 identify many novel variants associated with intrinsic functional signatures and illustrate  
16 the global genetic influences on functional connectivity across the whole brain. The  
17 degree of genetic control is higher in central executive, default mode, and salience  
18 networks, whose cross-network interactions closely control multiple cognitive functions  
19 and affect major brain disorders<sup>28</sup>.

20

### 21 **Validation and the effect of ethnicity.**

22 We aimed to validate our results in UKB British GWAS using other independent datasets.  
23 First, we repeated GWAS on UKB individuals of White but Non-British ancestry (UKBW,  $n$   
24 = 1,970). We found that 97.3% significant associations ( $P < 2.8 \times 10^{-11}$ ) in UKB British  
25 GWAS had the same effect signs in the UKBW GWAS, and 82.5% had smaller  $P$ -values  
26 after meta-analyzing the two GWAS. These results suggest similar effect sizes and  
27 directions of the top variants among the European subjects within the UKB study<sup>61,62</sup>.  
28 Next, we performed GWAS in three non-UKB European cohorts: ABCD European  
29 (ABCDE,  $n = 3,821$ ), HCP ( $n = 495$ ), and PNC ( $n = 510$ ). We meta-analyzed UKBW with the  
30 three non-UKB GWAS and checked whether the locus-trait associations detected in UKB  
31 British GWAS can be validated in the meta-analyzed validation GWAS ( $n = 6,796$ ). For  
32 the 604 significant associations, 115 (19%) passed the  $8.2 \times 10^{-5}$  (i.e., 0.05/604)

1 Bonferroni significance level in this validation GWAS, and 599 (99.2%) were significant at  
2 FDR 5% level (**Supplementary Table 6**). Moreover, we performed a third meta-analysis  
3 to combine all of the five European GWAS, after which 75.5% significant associations in  
4 UKB British GWAS had smaller *P*-values. Overall, our results suggest that the associated  
5 genetic loci discovered in UKB British GWAS have high generalizability in independent  
6 European rsfMRI studies, despite the fact that these studies may use different imaging  
7 protocols/MRI scanners and recruit participants from different age groups. The good  
8 homogeneity of GWAS results may partially benefit from the consistent rsfMRI  
9 processing procedures that we applied to these datasets.

10

11 We further examined replication using polygenic risk scores<sup>63</sup> (PRS) derived from UKB  
12 British GWAS (Methods). For the 197 traits that had significant variants, 168 had  
13 significant PRS in at least one of the four European validation GWAS datasets at FDR 5%  
14 level (197 × 4 tests, **Supplementary Table 7**), illustrating the significant out-of-sample  
15 prediction power of our discovery GWAS results. The largest incremental R-squared  
16 were observed on the 2nd, 3rd, 4th, and 6th global functional connectivity measures in  
17 UKBW and HCP datasets, which were larger than 5% (range = (5.1%, 5.7%), *P* range =  
18 (1.1 × 10<sup>-24</sup>, 4 × 10<sup>-13</sup>)). To evaluate the influences of ethnicity, PRS was also constructed  
19 on four non-European validation datasets: the UKB Asian (UKBA, *n* = 446), UKB Black  
20 (UKBBL, *n* = 232), ABCD Hispanic (ABCDH, *n* = 768), and ABCD African American (ABCD A,  
21 *n* = 1,257). UKBA had the best validation performance among the four datasets, with 86  
22 PRS being significant at FDR 5% level (197 × 4 tests, **Supplementary Table 7**). The  
23 number of significant PRS was reduced to 59, 39, and 31 in ABCDH, ABCDA, and UKBBL,  
24 respectively. In summary, these PRS results illustrate the overall consistency of genetic  
25 effects in European cohorts and also show the potential negative effects of ethnicity in  
26 cross-population applications, especially for Black/African-American cohorts. More  
27 efforts are required to identify further loci associated with functional brain in global  
28 diverse populations.

29

### 30 **The shared genetic loci with brain-related complex traits and disorders.**

31 To evaluate the shared genetic influences between intrinsic brain activity and other  
32 complex traits, we carried out association lookups for the 328 significant variants (and

1 their LD tags, i.e., variants with LD  $r^2 \geq 0.6$ ) detected in UKB British GWAS (Methods).  
2 On the NHGRI-EBI GWAS catalog<sup>64</sup>, our results tagged many variants reported for a wide  
3 range of complex traits in different trait domains, such as cognitive performance,  
4 neurological and psychiatric disorders, education, bone mineral density, sleep,  
5 smoking/drinking, brain structure, and anthropometric traits (**Supplementary Table 8**).  
6 Below we highlighted colocalizations in a few selected genomic regions.

7

8 The 17q21.31 region was associated with functional connectivity of temporal and frontal  
9 regions mostly involved in central executive, default mode, and salience networks (**Fig.**  
10 **3a**). This genomic region has been reported by Parkinson's disease studies<sup>65-69</sup>. As a  
11 system-level progressive neurodegenerative disorder<sup>70</sup>, Parkinson's disease not only led  
12 to motor abnormalities, but also had non-motor symptoms such as temporal perception  
13 abnormalities<sup>71</sup> and impaired connectivity among frontal regions<sup>72</sup>. Cognitive  
14 dysfunction and disrupted coupling between default mode and salience networks were  
15 commonly reported in Parkinson's disease<sup>27</sup>. In addition to Parkinson's disease, the  
16 17q21.31 region was widely related to other complex traits, including neurological  
17 disorders (e.g., Alzheimer's disease<sup>73</sup>, corticobasal degeneration<sup>74</sup>, progressive  
18 supranuclear palsy<sup>75</sup>), psychiatric disorders (e.g., autism spectrum disorder<sup>76</sup>, depressive  
19 symptoms<sup>77</sup>), educational attainment<sup>78,79</sup>, psychological traits (e.g., neuroticism<sup>77</sup>),  
20 cognitive traits (cognitive ability<sup>80</sup>), sleep<sup>81</sup>, heel bone mineral density<sup>82</sup>, alcohol use  
21 disorder<sup>83</sup>, subcortical brain volumes<sup>44</sup>, and white matter microstructure<sup>59</sup>.

22

23 Next, the 19q13.32 region had genetic effects on the amplitude of many functional brain  
24 regions that were most in default mode, central executive (i.e., frontoparietal),  
25 attention, and visual networks (**Fig. 3b**). It is well known that 19q13.32 is a risk locus of  
26 Alzheimer's disease, containing genes such as *APOE*, *APOC*, and *TOMM40*. In this region,  
27 we tagged variants associated with dementia and decline in mental ability, including  
28 Alzheimer's disease<sup>84-88</sup>, frontotemporal dementia<sup>89</sup>, cerebral amyloid angiopathy<sup>90</sup>,  
29 cognitive decline<sup>91-93</sup>, cognitive impairment test score<sup>94</sup>, as well as many biomarkers of  
30 Alzheimer's disease, such as neurofibrillary tangles<sup>90</sup>, neuritic plaque<sup>90</sup>, cerebral amyloid  
31 deposition<sup>95</sup>, cerebrospinal fluid protein levels<sup>94</sup>, and cortical amyloid beta load<sup>88</sup>.  
32 Altered amplitude activity has been widely reported in patients of cognitive impairment



1 and Alzheimer's disease<sup>96,97</sup>. The brain degeneration related to Alzheimer's disease may  
2 begin in the frontoparietal regions<sup>98</sup> and was associated with dysfunction of multiple  
3 RSNs, especially the default mode network<sup>22</sup>. Our findings suggest the shared genetic  
4 influences between intrinsic neuronal activity and brain atrophy of Alzheimer's disease.

5  
6 In addition, the 2p16.1 and 5q15 regions were mainly associated with interactions  
7 among central executive, default mode, and salience networks (**Fig. 3c, Fig. 3d, and**  
8 **Supplementary Fig. 2**). We observed colocalizations with psychiatric disorders (e.g.,  
9 schizophrenia<sup>99</sup>, MDD<sup>100</sup>, depressive symptoms<sup>101</sup>, autism spectrum disorder<sup>102</sup>),  
10 psychological traits (e.g., neuroticism<sup>77</sup>, well-being spectrum<sup>103</sup>), sleep<sup>104</sup>, cognitive traits  
11 (e.g., intelligence<sup>105</sup>), and hippocampus subfield volumes<sup>106</sup>. Dysregulated triple network  
12 interactions were frequently reported in patients of schizophrenia<sup>107</sup>, depression<sup>108</sup>, and  
13 autism spectrum disorder<sup>109</sup>. Similarly, the 2q24.2 and 10q26.13 regions had genetic  
14 effects on functional connectivity traits involved in central executive, default mode,  
15 salience, and attention networks (**Supplementary Figs. 3-4**). In these two regions, our  
16 identified variants tagged those that have been implicated with schizophrenia<sup>110</sup>,  
17 educational attainment<sup>78</sup>, cognitive traits (e.g., cognitive ability<sup>80</sup>), smoking/drinking  
18 (e.g., smoking status<sup>79,111</sup>, alcohol consumption<sup>111</sup>), hippocampus subfield volumes<sup>106</sup>,  
19 and heel bone mineral density<sup>82</sup>. We also observed colocalizations in many other  
20 genomic regions, such as in 2q14.1 region with sleep traits (e.g., sleep duration<sup>81,112</sup>,  
21 insomnia<sup>104</sup>), in 3p11.1 with cognitive traits (e.g., cognitive ability<sup>113</sup>, intelligence<sup>114</sup>,  
22 math ability<sup>78</sup>), in 2p21 with heel bone mineral density<sup>79,115</sup>, and in 6p25.3 with  
23 stroke<sup>116,117</sup>. In summary, instinct brain function has wide genetic links to a large  
24 number of brain-related complex traits and clinical outcomes, especially the  
25 neurological and psychiatric disorders and cognitive traits.

26

### 27 **Genetic correlations with brain structure and cognition.**

28 To explore whether genetically mediated brain structural changes were associated with  
29 brain function, we examined pairwise genetic correlations (gc) between 82 intrinsic  
30 brain activity traits (i.e., the 76 amplitude traits and the 6 global functional connectivity  
31 measures) and 315 traits of brain structure via LDSC<sup>118</sup> (Methods), including 100  
32 regional brain volumes<sup>43</sup> and 215 DTI traits of brain structural connectivity in white

1 matter tracts<sup>119</sup>. There were 137 significant pairs between 44 intrinsic brain functional  
2 traits and 87 brain structural traits at FDR 5% level ( $82 \times 315$  tests,  $|gc|$  range = (0.18,  
3 0.44),  $P$  range = ( $4.3 \times 10^{-12}$ ,  $2.6 \times 10^{-4}$ ), **Supplementary Table 9**).

4  
5 We found significant genetic correlations between global functional connectivity  
6 measures and regional volumes in cerebral cortex, including prefrontal (caudal middle  
7 frontal, pars orbitalis, pars triangularis) and precentral of frontal lobe; superolateral  
8 (inferior parietal, supramarginal) and postcentral of parietal lobe; superolateral  
9 (transverse temporal, middle temporal, superior temporal) of temporal lobe; and insula  
10 ( $|gc|$  range = (0.2, 0.42),  $P < 1.4 \times 10^{-4}$ , **Fig. 4a**). These global functional connectivity  
11 measures mainly represented the central executive, default mode, salience, and  
12 attention networks, suggesting the widely shared genetic influences between cerebral  
13 cortex volumes and cognition. Amplitude traits also had significant genetic correlations  
14 with brain volumes, most of which were negative. For example, 16 amplitude traits  
15 across multiple RSNs had significant genetic correlations with total brain volume ( $|gc|$   
16 range = (0.2, 0.41),  $P < 2 \times 10^{-4}$ ). It is well known that brain size/volume is phenotypically  
17 associated with intrinsic amplitude<sup>120</sup>. Moreover, the amplitude of putamen and  
18 caudate regions in subcortical-cerebellum network<sup>17</sup> was genetically correlated with  
19 ventricular volumes ( $|gc|$  range = (0.26, 0.36),  $P < 5.9 \times 10^{-5}$ ). Ventricular volumes are  
20 known to be related to subcortical volumes<sup>121,122</sup>. For the amplitude of precuneus region  
21 in default mode and central executive networks, we observed significant genetic  
22 correlations with cuneus, lingual, and pericalcarine volumes in occipital lobe ( $|gc|$  range  
23 = (0.2, 0.37),  $P < 1 \times 10^{-4}$ ). In addition, the amplitude of occipital regions (calcarine,  
24 lingual, and cuneus) in visual network had significant genetic correlations with  
25 pericalcarine volume ( $|gc|$  range = (0.3, 0.44),  $P < 5.1 \times 10^{-5}$ ). Cerebral cortex is deeply  
26 involved in a wide variety of brain function<sup>19,123</sup>. Our results uncover the genetic links  
27 between intrinsic brain function and the associated structural substrates.

28  
29 Significant genetic correlations were also observed between intrinsic brain activity and  
30 brain structural connectivity (**Fig. 4b**). We highlighted the amplitude of frontal regions  
31 (precentral, middle/inferior frontal) in central executive network, which had significant  
32 genetic correlations with global integrity of white matter and tract-specific integrity in

1 body of corpus callosum (BCC), cingulum cingulate gyrus (CGC), external capsule (EC),  
2 long anterior limb of internal capsule (ALIC), posterior limb of internal capsule (RLIC),  
3 and superior longitudinal fasciculus (SLF) tracts ( $|gc|$  range = (0.2, 0.29),  $P < 2.5 \times 10^{-4}$ ).  
4 Another example is the amplitude of occipital and temporal regions (middle occipital,  
5 inferior/middle temporal) in visual and attention networks, which was genetically  
6 correlated with the structural connectivity in BCC, fornix (FX), superior corona radiata  
7 (SCR), posterior corona radiata (PCR), posterior limb of internal capsule (PLIC), RLIC, and  
8 SLF tracts ( $|gc|$  range = (0.22, 0.37),  $P < 2.4 \times 10^{-4}$ ). In addition, global functional  
9 connectivity measures were genetically correlated with BCC, genu of corpus callosum  
10 (GCC), splenium of corpus callosum (SCC), EC, posterior thalamic radiation (PTR), SLF,  
11 uncinate fasciculus (UNC), corticospinal tract (CST), and sagittal stratum (SS) tracts ( $|gc|$   
12 range = (0.18, 0.41),  $P < 2.2 \times 10^{-4}$ ). Structural connectivity and functional connectivity  
13 have a complex but close relationship<sup>20,124</sup>, and our analyses provide new insights into  
14 their genetic overlaps. To our knowledge, these results are the first to indicate that  
15 genetic changes in brain structure may also impact intrinsic brain function and result in  
16 brain functional differences.

17

18 Next, we examined the genetic correlations between 1,777 intrinsic brain activity traits  
19 and 30 other complex traits, mainly focusing on cognition and brain disorders  
20 (**Supplementary Table 10**). We found 176 significant pairs between 26 complex traits  
21 and 102 intrinsic brain activity traits at FDR 5% level ( $30 \times 1,777$  tests,  $P$  range = ( $8.6 \times$   
22  $10^{-12}$ ,  $2.3 \times 10^{-3}$ ), **Supplementary Table 11**). For amplitude traits, we detected significant  
23 genetic correlations with cognitive traits studied in previous GWAS, including cognitive  
24 performance, general cognitive function, intelligence, and numerical reasoning ( $|gc|$   
25 range = (0.15, 0.21),  $P < 1.8 \times 10^{-4}$ , **Fig. 5**). We also observed significant genetic  
26 correlations with cross disorder (five major psychiatric disorders<sup>125</sup>) ( $|gc|$  range = (0.32,  
27 0.33),  $P < 9.7 \times 10^{-5}$ ) and sleep ( $|gc|$  range = (0.15, 0.18),  $P < 1.6 \times 10^{-4}$ ). The association  
28 between intrinsic amplitude and cognition<sup>21</sup>, sleep<sup>126</sup>, and brain disorders<sup>127</sup> had been  
29 previously reported. Furthermore, many significant genetic correlations were uncovered  
30 between intrinsic functional connectivity and brain-related traits, such as education,  
31 cognitive traits, cross disorder, attention-deficit/hyperactivity disorder (ADHD),  
32 schizophrenia, MDD, neuroticism, sleep, risk tolerance, and subjective well-being. For

1 example, ADHD was genetically correlated with functional connectivity in attention,  
2 somatomotor, and subcortical-cerebellum networks ( $|gc| = 0.31$ ,  $P = 1.2 \times 10^{-4}$ ), and  
3 MDD had significant genetic correlations with default mode, central executive, and  
4 salience networks ( $|gc|$  range = (0.26, 0.27),  $P < 1.2 \times 10^{-4}$ ) (**Supplementary Fig. 5**). In  
5 addition, many functional connectivity traits across major RSNs had genetic correlations  
6 with education ( $|gc|$  range = (0.14, 0.35),  $P < 1.8 \times 10^{-4}$ ), cognitive performance ( $|gc|$   
7 range = (0.15, 0.35),  $P < 1.3 \times 10^{-4}$ ), cross disorder ( $|gc|$  range = (0.26, 0.37),  $P < 8.7 \times$   
8  $10^{-5}$ ), and schizophrenia ( $|gc|$  range = (0.18, 0.3),  $P < 1.2 \times 10^{-4}$ ), matching previously  
9 reported phenotypical associations<sup>55,107,109</sup> (**Supplementary Figs. 6-8**). We also found  
10 broad genetic correlations with manual occupation<sup>128</sup> ( $|gc|$  range = (0.15, 0.24),  $P < 1.5$   
11  $\times 10^{-4}$ ), BMI<sup>129</sup> ( $|gc|$  range = (0.2, 0.37),  $P < 1.5 \times 10^{-4}$ ), and behavioral factors  
12 (drinking<sup>130</sup> and smoking<sup>131</sup>), all of which had been linked to brain functional differences.  
13

#### 14 **Gene-level association analysis and biological annotations.**

15 Gene-level association was tested via MAGMA<sup>132</sup> (Methods), which detected 970  
16 significant gene-trait associations ( $P < 1.5 \times 10^{-9}$ , adjusted for 1,777 phenotypes) for 123  
17 genes (**Supplementary Fig. 9, Supplementary Table 12**). In addition, we applied FUMA<sup>60</sup>  
18 to map significant variants ( $P < 2.8 \times 10^{-11}$ ) to genes via physical position, expression  
19 quantitative trait loci (eQTL) association, and 3D chromatin (Hi-C) interaction, which  
20 yielded 273 more associated genes that were not discovered in MAGMA (352 in total,  
21 **Supplementary Table 13**). For the 396 genes associated with intrinsic brain activity in  
22 either MAGMA or FUMA, 89 had been linked to white matter microstructure<sup>119</sup>, 52 were  
23 reported to be associated with regional brain volumes<sup>43</sup>, and 43 were related to both of  
24 them (**Supplementary Table 14**). These triple overlapped genes were also widely  
25 associated with other complex traits, such as Parkinson's disease, neuroticism, alopecia,  
26 handedness, reaction time, and intelligence (**Supplementary Table 15**), providing more  
27 insights into the genetic overlaps among brain structure, brain function, and other  
28 brain-related traits. For example, *MAPT*, *NSF*, *WNT3*, *CRHR1*, *PLEKHM1*, *STH*, *LRR37A3*,  
29 *ARHGAP27*, *KANSL1*, and *SPPL2C* were risk genes of Parkinson's disease, which were also  
30 associated with pallidum grey matter volume<sup>43</sup>, fractional anisotropy and mean  
31 diffusivity of white matter microstructure<sup>119</sup>, and intrinsic functional connectivity in  
32 central executive, default mode, and salience networks. These complementary

1 neuroimaging traits had all been used to study the pathophysiology of Parkinson's  
2 disease<sup>133-135</sup>. In addition, 5 of our intrinsic brain activity associated genes (*CALR*, *CALY*,  
3 *SLC47A1*, *CYP2C8*, *CYP2C9*) were targets for 12 nervous system drugs<sup>136</sup>, such as 5  
4 psycholeptics (ATC code: N05) to produce calming effects, 2 anti-depressants (N06A) to  
5 treat MDD and related conditions, 2 anti-migraine (N02C), and one anti-dementia  
6 (N06D) (**Supplementary Table 16**).

7

8 It is of particular interest to study the functional connectivity dysfunction in Alzheimer's  
9 disease and identify the overlapped genes<sup>22,137</sup>. Our gene-level analysis replicated *APOE*  
10 and *SORL1*, which were frequently targeted in Alzheimer's disease-candidate gene  
11 studies of functional connectivity<sup>29,138</sup>. More importantly, we uncovered more  
12 overlapped genes between intrinsic brain activity and Alzheimer's disease, such as  
13 *PVRL2*, *TOMM40*, *APOC1*, *MAPK7*, *CLPTM1*, *HESX1*, *BCAR3*, *ANO3*, and *YAP1*  
14 (**Supplementary Table 17**). These genes had much stronger associations with intrinsic  
15 brain activity than brain structure. We also found many pleiotropic genes associated  
16 with serum metabolite, low density lipoprotein cholesterol, high density lipoprotein  
17 cholesterol, triglyceride, type II diabetes mellitus, and blood protein measurements, all  
18 of which might be related to the Alzheimer's disease<sup>139,140</sup>. These results largely expand  
19 the overview of the shared genetic components among metabolic dysfunction, blood  
20 biomarkers, brain function, and Alzheimer's disease, suggesting the potential value of  
21 integrating these traits in future Alzheimer's disease research.

22

23 To identify the tissues and cell types in which genetic variation yields differences in  
24 functional connectivity, we performed partitioned heritability analyses<sup>141</sup> for tissue type  
25 and cell type specific regulatory elements<sup>142</sup> (Methods). We focused on the 10  
26 functional connectivity traits that had heritability larger than 30%. At FDR 5% level, the  
27 most significant enrichments of heritability were observed in active gene regulation  
28 regions of fetal brain tissues, neurospheres, and neuron/neuronal progenitor cultured  
29 cells (**Supplementary Fig. 10, Supplementary Table 18**). We also tried to further identify  
30 brain cell type specific enrichments using chromatin accessibility data of two main gross  
31 brain cell types<sup>143</sup> (i.e., neurons (NeuN+) and glia (NeuN-)) and multiple neuronal and  
32 glial cell subtypes, including oligodendrocyte (NeuN-/Sox10+), microglia, and astrocyte

1 (NeuN-/Sox10-), as well as GABAergic (NeuN+/Sox6+) and glutamatergic neurons  
2 (NeuN+/Sox6-). No significant enrichment was detected for these brain cell types after  
3 adjusting for multiple testing. Next, we performed MAGMA tissue-specific gene  
4 property<sup>132</sup> analysis for 13 GTEx<sup>144</sup> (v8) brain tissues (Methods). We found that genes  
5 with higher expression levels in human brain tissues generally had stronger associations  
6 with intrinsic brain activity, particularly for tissues sampled from cerebellar hemisphere  
7 and cerebellum regions ( $P < 1.9 \times 10^{-5}$ , **Supplementary Fig. 11, Supplementary Table**  
8 **19**).

9

10 MAGMA<sup>132</sup> gene-set analysis was performed to prioritize the enriched biological  
11 pathways (Methods). We found 59 significantly enriched gene sets after Bonferroni  
12 adjustment ( $P < 1.8 \times 10^{-9}$ , **Supplementary Table 20**). Multiple pathways related to  
13 nervous system were detected, such as “go neurogenesis” (GO: 0022008), “go neuron  
14 differentiation” (GO: 0030182), “go regulation of nervous system development” (GO:  
15 0051960), “go regulation of neuron differentiation” (GO: 0045664), “go cell  
16 morphogenesis involved in neuron differentiation” (GO: 0048667), and “go neuron  
17 development” (GO: 0048666). Other frequently prioritized gene sets included “dacosta  
18 uv response via ercc3 dn” (M4500), “go dna binding transcription factor activity”  
19 (GO:0003700), “go sequence specific dna binding” (GO:0043565), “dacosta uv response  
20 via ercc3 common dn” (M13522), “go negative regulation of rna biosynthetic process”  
21 (GO:1902679), “go negative regulation of biosynthetic process” (GO:0009890), and “go  
22 regulatory region nucleic acid binding” (GO: 0001067). M4500 and M13522 are  
23 *ERCC3*-associated gene sets related to xeroderma pigmentosum (XP) and  
24 trichothiodystrophy (TTD) syndromes<sup>145,146</sup>. The *ERCC3* gene was highly relevant to the  
25 progression of Alzheimer's disease<sup>147</sup>. Patients affected with XP or TTD may have  
26 primary neuronal degeneration and reduced myelination<sup>146</sup>, which were closely related  
27 to abnormal functional connectivity<sup>148</sup> and intellectual impairment<sup>149</sup>.

28

## 29 **DISCUSSION**

30 In the present study, we evaluated the influences of common variants on intrinsic brain  
31 functional architecture using uniformly processed rsfMRI data of 44,190 subjects from  
32 four independent studies. Genome-wide association analysis found hundreds of novel

1 loci related to intrinsic brain activity in the UKB British cohort, which were successfully  
2 replicated in independent datasets. The interactions across core neurocognitive  
3 networks (central executive, default mode, and salience) in the triple network model  
4 had genetic links with cognition and multiple brain disorders. The shared genetic  
5 factors among functional, structural, and diffusion neuroimaging traits were also  
6 uncovered. Gene-level analysis detected many overlapped genes between intrinsic brain  
7 activity and Alzheimer's disease. The enriched tissues and biological pathways were also  
8 prioritized in bioinformatic analyses. Compared to the previous study<sup>37</sup> with about 8,000  
9 subjects, this large-scale GWAS much improved our understanding of the genetic  
10 architecture of functional human brain.

11

12 Our study faces a few limitations. First, the samples in our discovery GWAS were mainly  
13 from European ancestry. In our PRS analysis, we illustrated the negative effects of  
14 ethnicity when applying the European GWAS results on validation cohorts with  
15 non-European ancestry. The multi-ethnic genetic architecture of intrinsic brain activity  
16 needs to be further investigated when more rsfMRI data from global populations  
17 become available. Second, our study focused on the brain functional activity at rest.  
18 Recent study<sup>34</sup> had found that combining rsfMRI and task functional magnetic  
19 resonance imaging (tfMRI) may result in higher heritability estimates and potentially  
20 boost the GWAS power. Thus, future studies could model rsfMRI and tfMRI together to  
21 uncover more insights into the genetic influences on brain function. In addition, we  
22 applied ICA in this study, which was a popular data-driven approach to characterize the  
23 functionally connected brain<sup>2</sup>. It is also of great interest to evaluate the performance of  
24 other popular rsfMRI approaches (such as seed-based analysis and graph theory) in  
25 these large-scale datasets. Finally, although we found the genetic links between brain  
26 function and other complex traits, the shared biological mechanisms and causal genetic  
27 relationships among these traits remain largely unclear. More efforts are required to  
28 enhance our knowledge of human brain using the accumulating publicly available  
29 imaging genetics data resources.

30

31 **URLs.**

32 Brain Imaging GWAS Summary Statistics, <https://github.com/BIG-S2/GWAS>;

- 1 Brain Imaging Genetics Knowledge Portal, <https://bigkp.web.unc.edu/>;
- 2 UKB Imaging Pipeline, [https://git.fmrib.ox.ac.uk/falmagro/UK\\_biobank\\_pipeline\\_v\\_1](https://git.fmrib.ox.ac.uk/falmagro/UK_biobank_pipeline_v_1);
- 3 PLINK, <https://www.cog-genomics.org/plink2/>;
- 4 GCTA & fastGWA, <http://cnsngenomics.com/software/gcta/>;
- 5 METAL, <https://genome.sph.umich.edu/wiki/METAL>;
- 6 FUMA, <http://fuma.ctglab.nl/>;
- 7 MGAMA, <https://ctg.cncr.nl/software/magma>;
- 8 LDSC, <https://github.com/bulik/ldsc/>;
- 9 FINDOR, <https://github.com/gkichaev/FINDOR>;
- 10 NHGRI-EBI GWAS Catalog, <https://www.ebi.ac.uk/gwas/home>;
- 11 The atlas of GWAS Summary Statistics, <http://atlas.ctglab.nl/>.

12

## 13 **METHODS**

14 Methods are available in the **Methods** section.

15 *Note: One supplementary information pdf file and one supplementary table zip file are*  
16 *available.*

17

## 18 **ACKNOWLEDGEMENTS**

19 This research was partially supported by U.S. NIH grants MH086633 (H.Z.) and  
20 MH116527 (TF.L.). We thank the individuals represented in the UK Biobank, ABCD, HCP,  
21 and PNC studies for their participation and the research teams for their work in  
22 collecting, processing and disseminating these datasets for analysis. We gratefully  
23 acknowledge all the studies and databases that made GWAS summary data available.

24 This research has been conducted using the UK Biobank resource (application number  
25 22783), subject to a data transfer agreement. Part of the data used in the preparation of  
26 this article were obtained from the Adolescent Brain Cognitive Development (ABCD)  
27 Study (<https://abcdstudy.org>), held in the NIMH Data Archive (NDA). This is a multisite,  
28 longitudinal study designed to recruit more than 10,000 children age 9-10 and follow  
29 them over 10 years into early adulthood. The ABCD Study is supported by the National  
30 Institutes of Health and additional federal partners under award numbers  
31 U01DA041022, U01DA041028, U01DA041048, U01DA041089, U01DA041106,  
32 U01DA041117, U01DA041120, U01DA041134, U01DA041148, U01DA041156,



1 U01DA041174, U24DA041123, U24DA041147, U01DA041093, and U01DA041025. A full  
2 list of supporters is available at <https://abcdstudy.org/federal-partners.html>. A listing of  
3 participating sites and a complete listing of the study investigators can be found at  
4 <https://abcdstudy.org/scientists/workgroups/>. ABCD consortium investigators designed  
5 and implemented the study and/or provided data but did not necessarily participate in  
6 analysis or writing of this report. This manuscript reflects the views of the authors and  
7 may not reflect the opinions or views of the NIH or ABCD consortium investigators.  
8 Support for the collection of the PNC datasets was provided by grant RC2MH089983  
9 awarded to Raquel Gur and RC2MH089924 awarded to Hakon Hakonarson. All PNC  
10 subjects were recruited through the Center for Applied Genomics at The Children's  
11 Hospital in Philadelphia. HCP data were provided by the Human Connectome Project,  
12 WU-Minn Consortium (Principal Investigators: David Van Essen and Kamil Ugurbil;  
13 1U54MH091657) funded by the 16 NIH Institutes and Centers that support the NIH  
14 Blueprint for Neuroscience Research; and by the McDonnell Center for Systems  
15 Neuroscience at Washington University.

16

#### 17 **AUTHOR CONTRIBUTIONS**

18 B.Z., H.Z., J.L.S., W.L., and Y.L. designed the study. B.Z., T.F.L., D.X., X.W., Y.Y., and T.Y.L.  
19 analyzed the data. T.F. L., Z.Z., and Y.S. downloaded the datasets, processed rsfMRI data,  
20 and undertook quantity controls. P.R., M.E.H., J.B., and J.F.F. analyzed brain cell  
21 chromatin accessibility data. B.Z. and H.Z. wrote the manuscript with feedback from all  
22 authors.

23

24 **CORRESPONDENCE AND REQUESTS FOR MATERIALS** should be addressed to H.Z.

25

#### 26 **COMPETING FINANCIAL INTERESTS**

27 The authors declare no competing financial interests.

28

#### 29 **REFERENCES**

30

- 31 1. Avena-Koenigsberger, A., Misić, B. & Sporns, O. Communication dynamics in  
32 complex brain networks. *Nature Reviews Neuroscience* **19**, 17 (2018).

- 1 2. Lv, H. *et al.* Resting-state functional MRI: everything that nonexperts have always  
2 wanted to know. *American Journal of Neuroradiology* **39**, 1390-1399 (2018).
- 3 3. Petersen, S.E. & Sporns, O. Brain networks and cognitive architectures. *Neuron*  
4 **88**, 207-219 (2015).
- 5 4. Park, H.-J. & Friston, K. Structural and functional brain networks: from  
6 connections to cognition. *Science* **342**(2013).
- 7 5. Medaglia, J.D., Lynall, M.-E. & Bassett, D.S. Cognitive network neuroscience.  
8 *Journal of cognitive neuroscience* **27**, 1471-1491 (2015).
- 9 6. van den Heuvel, M.P. & Sporns, O. Network hubs in the human brain. *Trends in*  
10 *cognitive sciences* **17**, 683-696 (2013).
- 11 7. Fox, M.D. & Greicius, M. Clinical applications of resting state functional  
12 connectivity. *Frontiers in systems neuroscience* **4**, 19 (2010).
- 13 8. Biswal, B., Zerrin Yetkin, F., Haughton, V.M. & Hyde, J.S. Functional connectivity  
14 in the motor cortex of resting human brain using echo-planar MRI. *Magnetic*  
15 *resonance in medicine* **34**, 537-541 (1995).
- 16 9. Fox, M.D. & Raichle, M.E. Spontaneous fluctuations in brain activity observed  
17 with functional magnetic resonance imaging. *Nature reviews neuroscience* **8**,  
18 700-711 (2007).
- 19 10. Alfaro-Almagro, F. *et al.* Image processing and Quality Control for the first 10,000  
20 brain imaging datasets from UK Biobank. *NeuroImage* **166**, 400-424 (2018).
- 21 11. Jia, X.-Z. *et al.* Percent amplitude of fluctuation: a simple measure for  
22 resting-state fMRI signal at single voxel level. *Plos one* **15**, e0227021 (2020).
- 23 12. Hutchison, R.M. *et al.* Dynamic functional connectivity: promise, issues, and  
24 interpretations. *Neuroimage* **80**, 360-378 (2013).
- 25 13. Lee, M.H., Smyser, C.D. & Shimony, J.S. Resting-state fMRI: a review of methods  
26 and clinical applications. *American Journal of neuroradiology* **34**, 1866-1872  
27 (2013).
- 28 14. Beckmann, C.F., DeLuca, M., Devlin, J.T. & Smith, S.M. Investigations into  
29 resting-state connectivity using independent component analysis. *Philosophical*  
30 *Transactions of the Royal Society B: Biological Sciences* **360**, 1001-1013 (2005).
- 31 15. Damoiseaux, J.S. *et al.* Consistent resting-state networks across healthy subjects.  
32 *Proceedings of the national academy of sciences* **103**, 13848-13853 (2006).

- 1 16. Grayson, D.S. & Fair, D.A. Development of large-scale functional networks from  
2 birth to adulthood: A guide to the neuroimaging literature. *Neuroimage* **160**,  
3 15-31 (2017).
- 4 17. Finn, E.S. *et al.* Functional connectome fingerprinting: identifying individuals  
5 using patterns of brain connectivity. *Nature neuroscience* **18**, 1664-1671 (2015).
- 6 18. Smith, S.M. *et al.* Correspondence of the brain's functional architecture during  
7 activation and rest. *Proceedings of the national academy of sciences* **106**,  
8 13040-13045 (2009).
- 9 19. Yeo, B.T. *et al.* The organization of the human cerebral cortex estimated by  
10 intrinsic functional connectivity. *Journal of neurophysiology* (2011).
- 11 20. Van Den Heuvel, M.P. & Pol, H.E.H. Exploring the brain network: a review on  
12 resting-state fMRI functional connectivity. *European neuropsychopharmacology*  
13 **20**, 519-534 (2010).
- 14 21. Fryer, S.L. *et al.* Relating intrinsic low-frequency BOLD cortical oscillations to  
15 cognition in schizophrenia. *Neuropsychopharmacology* **40**, 2705-2714 (2015).
- 16 22. Badhwar, A. *et al.* Resting-state network dysfunction in Alzheimer's disease: a  
17 systematic review and meta-analysis. *Alzheimer's & Dementia: Diagnosis,*  
18 *Assessment & Disease Monitoring* **8**, 73-85 (2017).
- 19 23. Wolters, A.F. *et al.* Resting-state fMRI in Parkinson's disease patients with  
20 cognitive impairment: A meta-analysis. *Parkinsonism & Related Disorders* **62**,  
21 16-27 (2019).
- 22 24. Mulders, P.C., van Eijndhoven, P.F., Schene, A.H., Beckmann, C.F. & Tendolkar, I.  
23 Resting-state functional connectivity in major depressive disorder: a review.  
24 *Neuroscience & Biobehavioral Reviews* **56**, 330-344 (2015).
- 25 25. Menon, V. & Uddin, L.Q. Saliency, switching, attention and control: a network  
26 model of insula function. *Brain Structure and Function* **214**, 655-667 (2010).
- 27 26. Menon, V. Large-scale brain networks and psychopathology: a unifying triple  
28 network model. *Trends in cognitive sciences* **15**, 483-506 (2011).
- 29 27. Putcha, D., Ross, R.S., Cronin-Golomb, A., Janes, A.C. & Stern, C.E. Saliency and  
30 default mode network coupling predicts cognition in aging and Parkinson's  
31 disease. *Journal of the International Neuropsychological Society: JINS* **22**, 205  
32 (2016).

- 1 28. Menon, V. The triple network model, insight, and large-scale brain organization  
2 in autism. *Biological psychiatry* **84**, 236 (2018).
- 3 29. Foo, H. *et al.* Genetic influence on ageing-related changes in resting-state brain  
4 functional networks in healthy adults: a systematic review. *Neuroscience &*  
5 *Biobehavioral Reviews* (2020).
- 6 30. Teeuw, J. *et al.* Genetic and environmental influences on functional connectivity  
7 within and between canonical cortical resting-state networks throughout  
8 adolescent development in boys and girls. *NeuroImage* **202**, 116073 (2019).
- 9 31. Meda, S.A. *et al.* Multivariate analysis reveals genetic associations of the resting  
10 default mode network in psychotic bipolar disorder and schizophrenia.  
11 *Proceedings of the National Academy of Sciences* **111**, E2066-E2075 (2014).
- 12 32. Duncan, L. *et al.* Analysis of polygenic risk score usage and performance in  
13 diverse human populations. *Nature communications* **10**, 1-9 (2019).
- 14 33. Glahn, D. *et al.* Genetic control over the resting brain. *Proceedings of the*  
15 *National Academy of Sciences* **107**, 1223-1228 (2010).
- 16 34. Elliott, M.L. *et al.* General functional connectivity: Shared features of  
17 resting-state and task fMRI drive reliable and heritable individual differences in  
18 functional brain networks. *NeuroImage* **189**, 516-532 (2019).
- 19 35. Ge, T., Holmes, A.J., Buckner, R.L., Smoller, J.W. & Sabuncu, M.R. Heritability  
20 analysis with repeat measurements and its application to resting-state functional  
21 connectivity. *Proceedings of the National Academy of Sciences* **114**, 5521-5526  
22 (2017).
- 23 36. Adhikari, B.M. *et al.* Heritability estimates on resting state fMRI data using  
24 ENIGMA analysis pipeline. (2018).
- 25 37. Elliott, L.T. *et al.* Genome-wide association studies of brain imaging phenotypes  
26 in UK Biobank. *Nature* **562**, 210-216 (2018).
- 27 38. Yang, J., Zeng, J., Goddard, M.E., Wray, N.R. & Visscher, P.M. Concepts,  
28 estimation and interpretation of SNP-based heritability. *Nature Genetics* **49**,  
29 1304-1310 (2017).
- 30 39. Chiesa, P.A. *et al.* Revolution of resting-state functional neuroimaging genetics in  
31 Alzheimer's disease. *Trends in neurosciences* **40**, 469-480 (2017).

- 1 40. Zhang, N. *et al.* APOE and KIBRA interactions on brain functional connectivity in  
2 healthy young adults. *Cerebral Cortex* **27**, 4797-4805 (2017).
- 3 41. Satizabal, C.L. *et al.* Genetic architecture of subcortical brain structures in 38,851  
4 individuals. *Nature genetics* **51**, 1624-1636 (2019).
- 5 42. Grasby, K.L. *et al.* The genetic architecture of the human cerebral cortex. *Science*  
6 **367**(2020).
- 7 43. Zhao, B. *et al.* Genome-wide association analysis of 19,629 individuals identifies  
8 variants influencing regional brain volumes and refines their genetic  
9 co-architecture with cognitive and mental health traits. *Nature Genetics* **51**,  
10 1637-1644 (2019).
- 11 44. Hibar, D.P. *et al.* Common genetic variants influence human subcortical brain  
12 structures. *Nature* **520**, 224-229 (2015).
- 13 45. Stein, J.L. *et al.* Identification of common variants associated with human  
14 hippocampal and intracranial volumes. *Nature Genetics* **44**, 552-561 (2012).
- 15 46. Smith, S.M. & Nichols, T.E. Statistical challenges in “big data” human  
16 neuroimaging. *Neuron* **97**, 263-268 (2018).
- 17 47. Botvinik-Nezer, R. *et al.* Variability in the analysis of a single neuroimaging  
18 dataset by many teams. *Nature*, 1-7 (2020).
- 19 48. Sudlow, C. *et al.* UK biobank: an open access resource for identifying the causes  
20 of a wide range of complex diseases of middle and old age. *PLoS Medicine* **12**,  
21 e1001779 (2015).
- 22 49. Casey, B. *et al.* The adolescent brain cognitive development (ABCD) study:  
23 imaging acquisition across 21 sites. *Developmental cognitive neuroscience* **32**,  
24 43-54 (2018).
- 25 50. Satterthwaite, T.D. *et al.* Neuroimaging of the Philadelphia neurodevelopmental  
26 cohort. *Neuroimage* **86**, 544-553 (2014).
- 27 51. Somerville, L.H. *et al.* The Lifespan Human Connectome Project in Development:  
28 A large-scale study of brain connectivity development in 5–21 year olds.  
29 *NeuroImage* **183**, 456-468 (2018).
- 30 52. Miller, K.L. *et al.* Multimodal population brain imaging in the UK Biobank  
31 prospective epidemiological study. *Nature Neuroscience* **19**, 1523-1536 (2016).

- 1 53. Beckmann, C.F. & Smith, S.M. Probabilistic independent component analysis for  
2 functional magnetic resonance imaging. *IEEE transactions on medical imaging*  
3 **23**, 137-152 (2004).
- 4 54. Hyvarinen, A. Fast and robust fixed-point algorithms for independent component  
5 analysis. *IEEE transactions on Neural Networks* **10**, 626-634 (1999).
- 6 55. Shen, X. *et al.* Resting-state connectivity and its association with cognitive  
7 performance, educational attainment, and household income in the UK Biobank.  
8 *Biological Psychiatry: Cognitive Neuroscience and Neuroimaging* **3**, 878-886  
9 (2018).
- 10 56. Smith, S.M. *et al.* Resting-state fMRI in the human connectome project.  
11 *Neuroimage* **80**, 144-168 (2013).
- 12 57. Rolls, E.T., Huang, C.-C., Lin, C.-P., Feng, J. & Joliot, M. Automated anatomical  
13 labelling atlas 3. *NeuroImage* **206**, 116189 (2020).
- 14 58. Yang, J., Lee, S.H., Goddard, M.E. & Visscher, P.M. GCTA: a tool for genome-wide  
15 complex trait analysis. *The American Journal of Human Genetics* **88**, 76-82  
16 (2011).
- 17 59. Zhao, B. *et al.* Large-scale GWAS reveals genetic architecture of brain white  
18 matter microstructure and genetic overlap with cognitive and mental health  
19 traits (n = 17,706). *Molecular Psychiatry* (2019).
- 20 60. Watanabe, K., Taskesen, E., Bochoven, A. & Posthuma, D. Functional mapping  
21 and annotation of genetic associations with FUMA. *Nature Communications* **8**,  
22 1826 (2017).
- 23 61. Jansen, P.R. *et al.* Genome-wide analysis of insomnia in 1,331,010 individuals  
24 identifies new risk loci and functional pathways. *Nature Genetics* **51**, 394-403  
25 (2019).
- 26 62. Skol, A.D., Scott, L.J., Abecasis, G.R. & Boehnke, M. Joint analysis is more efficient  
27 than replication-based analysis for two-stage genome-wide association studies.  
28 *Nature Genetics* **38**, 209-213 (2006).
- 29 63. Jansen, I.E. *et al.* Genome-wide meta-analysis identifies new loci and functional  
30 pathways influencing Alzheimer's disease risk. *Nature genetics* **51**, 404-413  
31 (2019).

- 1 64. Buniello, A. *et al.* The NHGRI-EBI GWAS Catalog of published genome-wide  
2 association studies, targeted arrays and summary statistics 2019. *Nucleic Acids*  
3 *Research* **47**, D1005-D1012 (2018).
- 4 65. Edwards, T.L. *et al.* Genome-wide association study confirms SNPs in SNCA and  
5 the MAPT region as common risk factors for Parkinson disease. *Annals of Human*  
6 *Genetics* **74**, 97-109 (2010).
- 7 66. Pickrell, J.K. *et al.* Detection and interpretation of shared genetic influences on  
8 42 human traits. *Nature genetics* **48**, 709 (2016).
- 9 67. Consortium, I.P.D.G. Imputation of sequence variants for identification of genetic  
10 risks for Parkinson's disease: a meta-analysis of genome-wide association  
11 studies. *The Lancet* **377**, 641-649 (2011).
- 12 68. Vacic, V. *et al.* Genome-wide mapping of IBD segments in an Ashkenazi PD  
13 cohort identifies associated haplotypes. *Human molecular genetics* **23**,  
14 4693-4702 (2014).
- 15 69. Pankratz, N. *et al.* Meta-analysis of Parkinson's disease: identification of a novel  
16 locus, RIT2. *Annals of neurology* **71**, 370-384 (2012).
- 17 70. Caligiore, D. *et al.* Parkinson's disease as a system-level disorder. *npj Parkinson's*  
18 *Disease* **2**, 1-9 (2016).
- 19 71. Bernardinis, M., Atashzar, S.F., Jog, M.S. & Patel, R.V. Differential Temporal  
20 Perception Abilities in Parkinson's Disease Patients Based on Timing Magnitude.  
21 *Scientific reports* **9**, 1-16 (2019).
- 22 72. Rowe, J. *et al.* Attention to action in Parkinson's disease: impaired effective  
23 connectivity among frontal cortical regions. *Brain* **125**, 276-289 (2002).
- 24 73. Jun, G. *et al.* A novel Alzheimer disease locus located near the gene encoding tau  
25 protein. *Molecular Psychiatry* **21**, 108-117 (2016).
- 26 74. Kouri, N. *et al.* Genome-wide association study of corticobasal degeneration  
27 identifies risk variants shared with progressive supranuclear palsy. *Nature*  
28 *communications* **6**, 7247 (2015).
- 29 75. Höglinger, G.U. *et al.* Identification of common variants influencing risk of the  
30 tauopathy progressive supranuclear palsy. *Nature genetics* **43**, 699 (2011).
- 31 76. Grove, J. *et al.* Identification of common genetic risk variants for autism  
32 spectrum disorder. *Nature genetics* **51**, 431 (2019).

- 1 77. Nagel, M. *et al.* Meta-analysis of genome-wide association studies for  
2 neuroticism in 449,484 individuals identifies novel genetic loci and pathways.  
3 *Nature Genetics* **50**, 920 (2018).
- 4 78. Lee, J.J. *et al.* Gene discovery and polygenic prediction from a genome-wide  
5 association study of educational attainment in 1.1 million individuals. *Nature*  
6 *Genetics* **50**, 1112–1121 (2018).
- 7 79. Kichaev, G. *et al.* Leveraging polygenic functional enrichment to improve GWAS  
8 power. *The American Journal of Human Genetics* **104**, 65–75 (2019).
- 9 80. Davies, G. *et al.* Genome-wide association study of cognitive functions and  
10 educational attainment in UK Biobank (N= 112 151). *Molecular Psychiatry* **21**,  
11 758–767 (2016).
- 12 81. Dashti, H. *et al.* GWAS in 446,118 European adults identifies 78 genetic loci for  
13 self-reported habitual sleep duration supported by accelerometer-derived  
14 estimates. *bioRxiv*, 274977 (2018).
- 15 82. Morris, J.A. *et al.* An atlas of genetic influences on osteoporosis in humans and  
16 mice. *Nature genetics* **51**, 258 (2019).
- 17 83. Sanchez-Roige, S. *et al.* Genome-wide association study meta-analysis of the  
18 Alcohol Use Disorders Identification Test (AUDIT) in two population-based  
19 cohorts. *American Journal of Psychiatry*, appi. ajp. 2018.18040369 (2018).
- 20 84. Jun, G.R. *et al.* Transethnic genome-wide scan identifies novel Alzheimer's  
21 disease loci. *Alzheimer's & Dementia* **13**, 727–738 (2017).
- 22 85. Nazarian, A., Yashin, A.I. & Kulminski, A.M. Genome-wide analysis of genetic  
23 predisposition to Alzheimer's disease and related sex disparities. *Alzheimer's*  
24 *research & therapy* **11**, 5 (2019).
- 25 86. Ramanan, V.K. *et al.* APOE and BCHE as modulators of cerebral amyloid  
26 deposition: a florbetapir PET genome-wide association study. *Molecular*  
27 *psychiatry* **19**, 351–357 (2014).
- 28 87. Harold, D. *et al.* Genome-wide association study identifies variants at CLU and  
29 PICALM associated with Alzheimer's disease. *Nature genetics* **41**, 1088 (2009).
- 30 88. Scelsi, M.A. *et al.* Genetic study of multimodal imaging Alzheimer's disease  
31 progression score implicates novel loci. *Brain* **141**, 2167–2180 (2018).



- 1 89. Ferrari, R. *et al.* A genome-wide screening and SNPs-to-genes approach to  
2 identify novel genetic risk factors associated with frontotemporal dementia.  
3 *Neurobiology of aging* **36**, 2904. e13-2904. e26 (2015).
- 4 90. Beecham, G.W. *et al.* Genome-wide association meta-analysis of  
5 neuropathologic features of Alzheimer's disease and related dementias. *PLoS*  
6 *Genet* **10**, e1004606 (2014).
- 7 91. Davies, G. *et al.* A genome-wide association study implicates the APOE locus in  
8 nonpathological cognitive ageing. *Molecular Psychiatry* **19**, 76-87 (2014).
- 9 92. Zhang, C. & Pierce, B.L. Genetic susceptibility to accelerated cognitive decline in  
10 the US Health and Retirement Study. *Neurobiology of aging* **35**, 1512. e11-1512.  
11 e18 (2014).
- 12 93. Raj, T. *et al.* Genetic architecture of age-related cognitive decline in African  
13 Americans. *Neurology Genetics* **3**(2017).
- 14 94. Liu, C. *et al.* Genome-wide association and mechanistic studies indicate that  
15 immune response contributes to Alzheimer's disease development. *Frontiers in*  
16 *genetics* **9**, 410 (2018).
- 17 95. Yan, Q. *et al.* Genome-wide association study of brain amyloid deposition as  
18 measured by Pittsburgh Compound-B (PiB)-PET imaging. *Molecular psychiatry*,  
19 1-13 (2018).
- 20 96. Liang, P. *et al.* Altered amplitude of low-frequency fluctuations in early and late  
21 mild cognitive impairment and Alzheimer's disease. *Current Alzheimer Research*  
22 **11**, 389-398 (2014).
- 23 97. Liu, X. *et al.* Abnormal amplitude of low-frequency fluctuations of intrinsic brain  
24 activity in Alzheimer's disease. *Journal of Alzheimer's Disease* **40**, 387-397 (2014).
- 25 98. Mattsson, N. *et al.* Emerging  $\beta$ -amyloid pathology and accelerated cortical  
26 atrophy. *JAMA neurology* **71**, 725-734 (2014).
- 27 99. Pardiñas, A.F. *et al.* Common schizophrenia alleles are enriched in  
28 mutation-intolerant genes and in regions under strong background selection.  
29 *Nature Genetics* **50**, 381–389 (2018).
- 30 100. Hyde, C.L. *et al.* Identification of 15 genetic loci associated with risk of major  
31 depression in individuals of European descent. *Nature genetics* **48**, 1031 (2016).

- 1 101. Howard, D.M. *et al.* Genome-wide meta-analysis of depression identifies 102  
2 independent variants and highlights the importance of the prefrontal brain  
3 regions. *Nature neuroscience* **22**, 343 (2019).
- 4 102. Anney, R.J. *et al.* Meta-analysis of GWAS of over 16,000 individuals with autism  
5 spectrum disorder highlights a novel locus at 10q24. 32 and a significant overlap  
6 with schizophrenia. *Molecular Autism* **8**, 21 (2017).
- 7 103. Baselmans, B.M. *et al.* Multivariate genome-wide analyses of the well-being  
8 spectrum. *Nature genetics* **51**, 445-451 (2019).
- 9 104. Lane, J.M. *et al.* Biological and clinical insights from genetics of insomnia  
10 symptoms. *Nature genetics* **51**, 387-393 (2019).
- 11 105. Hill, W. *et al.* A combined analysis of genetically correlated traits identifies 187  
12 loci and a role for neurogenesis and myelination in intelligence. *Molecular*  
13 *Psychiatry* **24**, 169–181 (2019).
- 14 106. van der Meer, D. *et al.* Brain scans from 21,297 individuals reveal the genetic  
15 architecture of hippocampal subfield volumes. *Molecular Psychiatry*, in press.  
16 (2018).
- 17 107. Supekar, K., Cai, W., Krishnadas, R., Palaniyappan, L. & Menon, V. Dysregulated  
18 brain dynamics in a triple-network saliency model of schizophrenia and its  
19 relation to psychosis. *Biological psychiatry* **85**, 60-69 (2019).
- 20 108. Zheng, H. *et al.* The altered triple networks interaction in depression under  
21 resting state based on graph theory. *BioMed research international* **2015**.
- 22 109. Uddin, L.Q. *et al.* Salience network–based classification and prediction of  
23 symptom severity in children with autism. *JAMA psychiatry* **70**, 869-879 (2013).
- 24 110. Ripke, S. *et al.* Biological insights from 108 schizophrenia-associated genetic loci.  
25 *Nature* **511**, 421 (2014).
- 26 111. Liu, M. *et al.* Association studies of up to 1.2 million individuals yield new insights  
27 into the genetic etiology of tobacco and alcohol use. *Nature genetics* **51**, 237-244  
28 (2019).
- 29 112. Jones, S.E. *et al.* Genome-wide association analyses of chronotype in 697,828  
30 individuals provides insights into circadian rhythms. *Nature communications* **10**,  
31 343 (2019).

- 1 113. Davies, G. *et al.* Study of 300,486 individuals identifies 148 independent genetic  
2 loci influencing general cognitive function. *Nature Communications* **9**, 2098  
3 (2018).
- 4 114. Savage, J.E. *et al.* Genome-wide association meta-analysis in 269,867 individuals  
5 identifies new genetic and functional links to intelligence. *Nature Genetics* **50**,  
6 912-919 (2018).
- 7 115. Kemp, J.P. *et al.* Identification of 153 new loci associated with heel bone mineral  
8 density and functional involvement of GPC6 in osteoporosis. *Nature genetics* **49**,  
9 1468 (2017).
- 10 116. Chauhan, G. *et al.* Identification of additional risk loci for stroke and small vessel  
11 disease: a meta-analysis of genome-wide association studies. *The Lancet*  
12 *Neurology* **15**, 695-707 (2016).
- 13 117. Malik, R. *et al.* Multiancestry genome-wide association study of 520,000 subjects  
14 identifies 32 loci associated with stroke and stroke subtypes. *Nature genetics* **50**,  
15 524-537 (2018).
- 16 118. Bulik-Sullivan, B. *et al.* An atlas of genetic correlations across human diseases  
17 and traits. *Nature Genetics* **47**, 1236-1241 (2015).
- 18 119. Zhao, B. *et al.* Common genetic variation influencing human white matter  
19 microstructure. *bioRxiv* (2020).
- 20 120. Qing, Z. & Gong, G. Size matters to function: brain volume correlates with  
21 intrinsic brain activity across healthy individuals. *Neuroimage* **139**, 271-278  
22 (2016).
- 23 121. Okada, N. *et al.* Abnormal asymmetries in subcortical brain volume in  
24 schizophrenia. *Molecular psychiatry* **21**, 1460-1466 (2016).
- 25 122. Levitt, J.J. *et al.* MRI study of caudate nucleus volume and its cognitive correlates  
26 in neuroleptic-naive patients with schizotypal personality disorder. *American*  
27 *Journal of Psychiatry* **159**, 1190-1197 (2002).
- 28 123. Schaefer, A. *et al.* Local-global parcellation of the human cerebral cortex from  
29 intrinsic functional connectivity MRI. *Cerebral cortex* **28**, 3095-3114 (2018).
- 30 124. Fjell, A.M. *et al.* Relationship between structural and functional connectivity  
31 change across the adult lifespan: a longitudinal investigation. *Human brain*  
32 *mapping* **38**, 561-573 (2017).

- 1 125. Consortium, C.-D.G.o.t.P.G. Identification of risk loci with shared effects on five  
2 major psychiatric disorders: a genome-wide analysis. *The Lancet* **381**, 1371-1379  
3 (2013).
- 4 126. Meng, X. *et al.* Increased Dynamic Amplitude of Low Frequency Fluctuation in  
5 Primary Insomnia. *Frontiers in Neurology* **11**, 609 (2020).
- 6 127. Liu, X. *et al.* Altered intrinsic coupling between functional connectivity density  
7 and amplitude of low-frequency fluctuation in mild cognitive impairment with  
8 depressive symptoms. *Neural plasticity* **2018**.
- 9 128. Golkar, A. *et al.* The influence of work-related chronic stress on the regulation of  
10 emotion and on functional connectivity in the brain. *PLoS One* **9**, e104550 (2014).
- 11 129. Kullmann, S. *et al.* The obese brain: association of body mass index and insulin  
12 sensitivity with resting state network functional connectivity. *Human brain*  
13 *mapping* **33**, 1052-1061 (2012).
- 14 130. Shokri-Kojori, E., Tomasi, D., Wiers, C.E., Wang, G.-J. & Volkow, N.D. Alcohol  
15 affects brain functional connectivity and its coupling with behavior: greater  
16 effects in male heavy drinkers. *Molecular psychiatry* **22**, 1185-1195 (2017).
- 17 131. Zhou, S. *et al.* Effect of smoking on resting-state functional connectivity in  
18 smokers: A n fMRI study. *Respirology* **22**, 1118-1124 (2017).
- 19 132. de Leeuw, C.A., Mooij, J.M., Heskes, T. & Posthuma, D. MAGMA: generalized  
20 gene-set analysis of GWAS data. *PLoS Computational Biology* **11**, e1004219  
21 (2015).
- 22 133. Atkinson-Clement, C., Pinto, S., Eusebio, A. & Coulon, O. Diffusion tensor imaging  
23 in Parkinson's disease: review and meta-analysis. *Neuroimage: Clinical* **16**,  
24 98-110 (2017).
- 25 134. Muralidharan, A. *et al.* Physiological changes in the pallidum in a progressive  
26 model of Parkinson's disease: Are oscillations enough? *Experimental neurology*  
27 **279**, 187-196 (2016).
- 28 135. Criaud, M. *et al.* Contribution of insula in Parkinson's disease: A quantitative  
29 meta-analysis study. *Human brain mapping* **37**, 1375-1392 (2016).
- 30 136. Wang, Q. *et al.* A Bayesian framework that integrates multi-omics data and gene  
31 networks predicts risk genes from schizophrenia GWAS data. *Nature*  
32 *neuroscience* **22**, 691 (2019).

- 1 137. Axelrud, L.K. *et al.* Genetic risk for Alzheimer's disease and functional brain  
2 connectivity in children and adolescents. *Neurobiology of aging* **82**, 10-17 (2019).
- 3 138. Karch, C.M. & Goate, A.M. Alzheimer's disease risk genes and mechanisms of  
4 disease pathogenesis. *Biological psychiatry* **77**, 43-51 (2015).
- 5 139. Zhu, Z., Lin, Y., Li, X., Driver, J.A. & Liang, L. Shared genetic architecture between  
6 metabolic traits and Alzheimer's disease: a large-scale genome-wide cross-trait  
7 analysis. *Human genetics* **138**, 271-285 (2019).
- 8 140. Varma, V.R. *et al.* Brain and blood metabolite signatures of pathology and  
9 progression in Alzheimer disease: A targeted metabolomics study. *PLoS medicine*  
10 **15**, e1002482 (2018).
- 11 141. Finucane, H.K. *et al.* Partitioning heritability by functional annotation using  
12 genome-wide association summary statistics. *Nature genetics* **47**, 1228-1235  
13 (2015).
- 14 142. Kundaje, A. *et al.* Integrative analysis of 111 reference human epigenomes.  
15 *Nature* **518**, 317 (2015).
- 16 143. Fullard, J.F. *et al.* An atlas of chromatin accessibility in the adult human brain.  
17 *Genome research* **28**, 1243-1252 (2018).
- 18 144. Aguet, F. *et al.* The GTEx Consortium atlas of genetic regulatory effects across  
19 human tissues. *BioRxiv*, 787903 (2019).
- 20 145. Uribe-Bojanini, E., Hernandez-Quiceno, S. & Cock-Rada, A.M. Xeroderma  
21 Pigmentosum with Severe Neurological Manifestations/De Sanctis-Cacchione  
22 Syndrome and a Novel XPC Mutation. *Case reports in medicine* **2017**(2017).
- 23 146. Kraemer, K.H. *et al.* Xeroderma pigmentosum, trichothiodystrophy and Cockayne  
24 syndrome: a complex genotype-phenotype relationship. *Neuroscience* **145**,  
25 1388-1396 (2007).
- 26 147. Wu, M. *et al.* Identification of key genes and pathways for Alzheimer's disease  
27 via combined analysis of genome-wide expression profiling in the hippocampus.  
28 *Biophysics Reports* **5**, 98-109 (2019).
- 29 148. Huntenburg, J.M. *et al.* A systematic relationship between functional  
30 connectivity and intracortical myelin in the human cerebral cortex. *Cerebral*  
31 *Cortex* **27**, 981-997 (2017).

- 1 149. Anttinen, A. *et al.* Neurological symptoms and natural course of xeroderma  
2 pigmentosum. *Brain* **131**, 1979-1989 (2008).
- 3 150. Bycroft, C. *et al.* The UK Biobank resource with deep phenotyping and genomic  
4 data. *Nature* **562**, 203-209 (2018).
- 5 151. Jiang, L. *et al.* A resource-efficient tool for mixed model association analysis of  
6 large-scale data. *Nature genetics* **51**, 1749 (2019).
- 7 152. Purcell, S. *et al.* PLINK: a tool set for whole-genome association and  
8 population-based linkage analyses. *The American Journal of Human Genetics* **81**,  
9 559-575 (2007).
- 10 153. Willer, C.J., Li, Y. & Abecasis, G.R. METAL: fast and efficient meta-analysis of  
11 genomewide association scans. *Bioinformatics* **26**, 2190-2191 (2010).
- 12 154. Consortium, I.H. Integrating common and rare genetic variation in diverse  
13 human populations. *Nature* **467**, 52-58 (2010).
- 14 155. Liberzon, A. *et al.* Molecular signatures database (MSigDB) 3.0. *Bioinformatics*  
15 **27**, 1739-1740 (2011).

16

## 17 **METHODS**

18 **Imaging phenotypes and datasets.** The rsfMRI datasets were consistently processed  
19 following the procedures in UK Biobank imaging pipeline<sup>10</sup>. Details about image  
20 acquisition, preprocessing, and phenotype generation in each dataset can be found in  
21 **Supplementary Note**. Following the previous study<sup>37</sup>, we generated two groups of  
22 phenotypes, including 76 node amplitude traits reflecting the spontaneous neuronal  
23 activity, 1,695 pairwise functional connectivity traits quantifying co-activity for node  
24 pairs, and 6 global functional connectivity measures to summarize all pairwise functional  
25 connectivity (**Supplementary Table 21**). For each continuous phenotype or covariate  
26 variable, values greater than five times the median absolute deviation from the median  
27 value were removed. We analyzed the following datasets separately: 1) the UKB  
28 discovery GWAS, which used data of individuals of British ancestry<sup>150</sup> in the UKB study ( $n$   
29 = 34,691); 2) four European validation GWAS: UKB White but Non-British (UKBW,  $n$  =  
30 1,970), ABCD European (ABCDE,  $n$  = 3,821), HCP ( $n$  = 495), and PNC ( $n$  = 510); 3) two  
31 non-European UKB validation GWAS: UKB Asian (UKBA,  $n$  = 446) and UKB Black (UKBBL,  
32  $n$  = 232); and 4) two non-European non-UKB validation GWAS, including ABCD Hispanic

1 (ABCDH,  $n = 768$ ) and ABCD African American (ABCD A,  $n = 1,257$ ). See **Supplementary**  
2 **Table 22** for a summary of these datasets and demographic information. The  
3 assignment of ancestry in UKB was based on self-reported ethnicity (Data-Field 21000),  
4 which was verified in Bycroft, et al. <sup>150</sup>. The ancestry in ABCD was assigned by  
5 combining the self-reported ethnicity and ancestry inference results as in Zhao, et al. <sup>119</sup>.  
6 The functional brain regions characterized in ICA were labelled using the automated  
7 anatomical labeling atlas<sup>57</sup> (**Supplementary Table 23**) and were mapped onto major  
8 RSNs defined in Yeo, et al. <sup>19</sup> and Finn, et al. <sup>17</sup> (**Supplementary Figs. 12-13,**  
9 **Supplementary Tables 24-26**). Details of mapping procedures can be found in  
10 **Supplementary Note**.

11

12 **GWAS discovery and validation.** Details of genotyping and quality controls can be found  
13 in **Supplementary Note**. SNP heritability was estimated by GCTA<sup>58</sup> using all autosomal  
14 SNPs in the UKB British cohort. We adjusted the effects of age (at imaging),  
15 age-squared, sex, age-sex interaction, age-squared-sex interaction, imaging site, and the  
16 top 40 genetic principle components (PCs). Genome-wide association analysis was  
17 performed in linear mixed effect model using fastGWA<sup>151</sup>, while adjusting the same set  
18 of covariates as in GCTA. GWAS were also separately performed via Plink<sup>152</sup> in European  
19 validation datasets UKBW, ABCDE, HCP, and PNC, where the effects of age, age-squared,  
20 sex, imaging sites (if applicable), age-sex interaction, age-squared-sex interaction, and  
21 top ten genetic PCs were adjusted.

22

23 To validate results in the UKB British discovery GWAS, meta-analysis was performed  
24 using the sample-size weighted approach via METAL<sup>153</sup>. We checked whether the  
25 locus-level associations detected in the British GWAS can be validated in the  
26 meta-analyzed GWAS. We also performed meta-analysis for the UKB British discovery  
27 GWAS and the meta-analyzed validation GWAS to check whether the  $P$ -values became  
28 smaller after combining these results. Polygenic risk scores (PRS) were constructed on  
29 eight validation datasets using Plink. The BLUP effect sizes estimated from GCTA-GREML  
30 analysis in UKB British discovery GWAS were used as weights in PRS construction, which  
31 accounted for the LD structures. Ambiguous variants (i.e. variants with complementary  
32 alleles) were removed from analysis. We tried 17  $P$ -value thresholds for variant

1 selection according to their marginal  $P$ -values from fastGWA: 1, 0.8, 0.5, 0.4, 0.3, 0.2,  
2 0.1, 0.08, 0.05, 0.02, 0.01,  $1 \times 10^{-3}$ ,  $1 \times 10^{-4}$ ,  $1 \times 10^{-5}$ ,  $1 \times 10^{-6}$ ,  $1 \times 10^{-7}$ , and  $1 \times 10^{-8}$ . The  
3 best prediction accuracy achieved by a single threshold was reported for each  
4 phenotype, which was measured by the additional phenotypic variation that can be  
5 explained by the polygenic profile (i.e., the incremental R-squared), adjusting for the  
6 effects of age, gender, and top ten genetic PCs.

7

8 **The shared loci and genetic correlation.** The genomic loci associated with intrinsic brain  
9 activity traits were defined using FUMA (version 1.3.5e). We input UKB British discovery  
10 summary statistics after reweighting the  $P$ -values using functional information via  
11 FINDOR<sup>79</sup>. After LD-based clumping, FUMA identified independent significant variants,  
12 which were defined as variants with a  $P$ -value smaller than the predefined threshold  
13 and were independent of other significant variants (LD  $r^2 < 0.2$ ). FUMA then constructed  
14 LD blocks for these independent significant variants by tagging all variants in LD ( $r^2 \geq$   
15 0.6) with at least one independent significant variant and had a MAF  $\geq 0.0005$ . These  
16 variants included those from the 1000 Genomes reference panel that may not have  
17 been included in the GWAS. Moreover, within these significant variants, independent  
18 lead variants were identified as those that were independent from each other (LD  $r^2 <$   
19 0.1). If LD blocks of independent significant variants were close (<250 kb based on the  
20 closest boundary variants of LD blocks), they were merged into a single genomic locus.  
21 Thus, each genomic locus could contain multiple significant variants and lead variants.  
22 Independent significant variants and all the variants in LD with them ( $r^2 \geq 0.6$ ) were  
23 searched by FUMA on the NHGRI-EBI GWAS catalog (version 2019-09-24) to look for  
24 previously reported associations ( $P < 9 \times 10^{-6}$ ) with any traits. LDSC<sup>118</sup> software (version  
25 1.0.1) was used to estimate and test the pairwise genetic correlation. We used the  
26 pre-calculated LD scores provided by LDSC, which were computed using 1000 Genomes  
27 European data. We used HapMap3<sup>154</sup> variants and removed all variants in the major  
28 histocompatibility complex (MHC) region. The summary statistics of intrinsic brain  
29 activity traits were from the UKB British discovery GWAS and the resources of other  
30 summary statistics were provided in **Supplementary Table 10**.

31



1 **Gene-level analysis and biological annotation.** Gene-based association analysis was  
2 performed in UKB British participants for 18,796 protein-coding genes using MAGMA<sup>132</sup>  
3 (version 1.07). Default MAGMA settings were used with zero window size around each  
4 gene. We then carried out FUMA functional annotation and mapping analysis, in which  
5 variants were annotated with their biological functionality and then were linked to  
6 35,808 candidate genes by a combination of positional, eQTL, and 3D chromatin  
7 interaction mappings. Brain-related tissues/cells were selected in all options and default  
8 values were used for all other parameters in FUMA. For the detected genes in MAGMA  
9 and FUMA, we performed lookups in the NHGRI-EBI GWAS catalog (version 2020-02-08)  
10 to explore their previously reported gene-trait associations. We performed heritability  
11 enrichment analysis via partitioned LDSC<sup>141</sup>. Baseline models were adjusted when  
12 estimating and testing the enrichment scores for our tissue type and cell type specific  
13 annotations. Methods to analysis chromatin data of glial and neuronal cell subtypes can  
14 be found in Zhao, et al. <sup>119</sup>. We also performed gene property analysis for the 13 GTEx<sup>144</sup>  
15 v8 brain tissues via MAGMA. Specifically, we examined whether the tissue-specific gene  
16 expression levels can be linked to the strength of the gene-trait association. MAGMA  
17 was also used to explore the enriched biological pathways, in which we tested 500  
18 curated gene sets and 9,996 Gene Ontology (GO) terms from the Molecular Signatures  
19 Database<sup>155</sup> (MSigDB, version 7.0).

## 21 **Code availability**

22 We made use of publicly available software and tools listed in URLs. Other codes used in  
23 our analyses are available upon reasonable request.

## 25 **Data availability**

26 Our GWAS summary statistics can be downloaded at <https://github.com/BIG-S2/GWAS>.  
27 The individual-level data used in the present study can be obtained from four publicly  
28 accessible data resources: UK Biobank (<http://www.ukbiobank.ac.uk/resources/>), ABCD  
29 (<https://abcdstudy.org/>), HCP (<https://www.humanconnectome.org/>), and PNC  
30 (<https://www.med.upenn.edu/bbl/philadelphianeurodevelopmentalcohort.html>). Our  
31 results can also be easily browsed through our knowledge portal  
32 <https://bigkp.web.unc.edu/>.

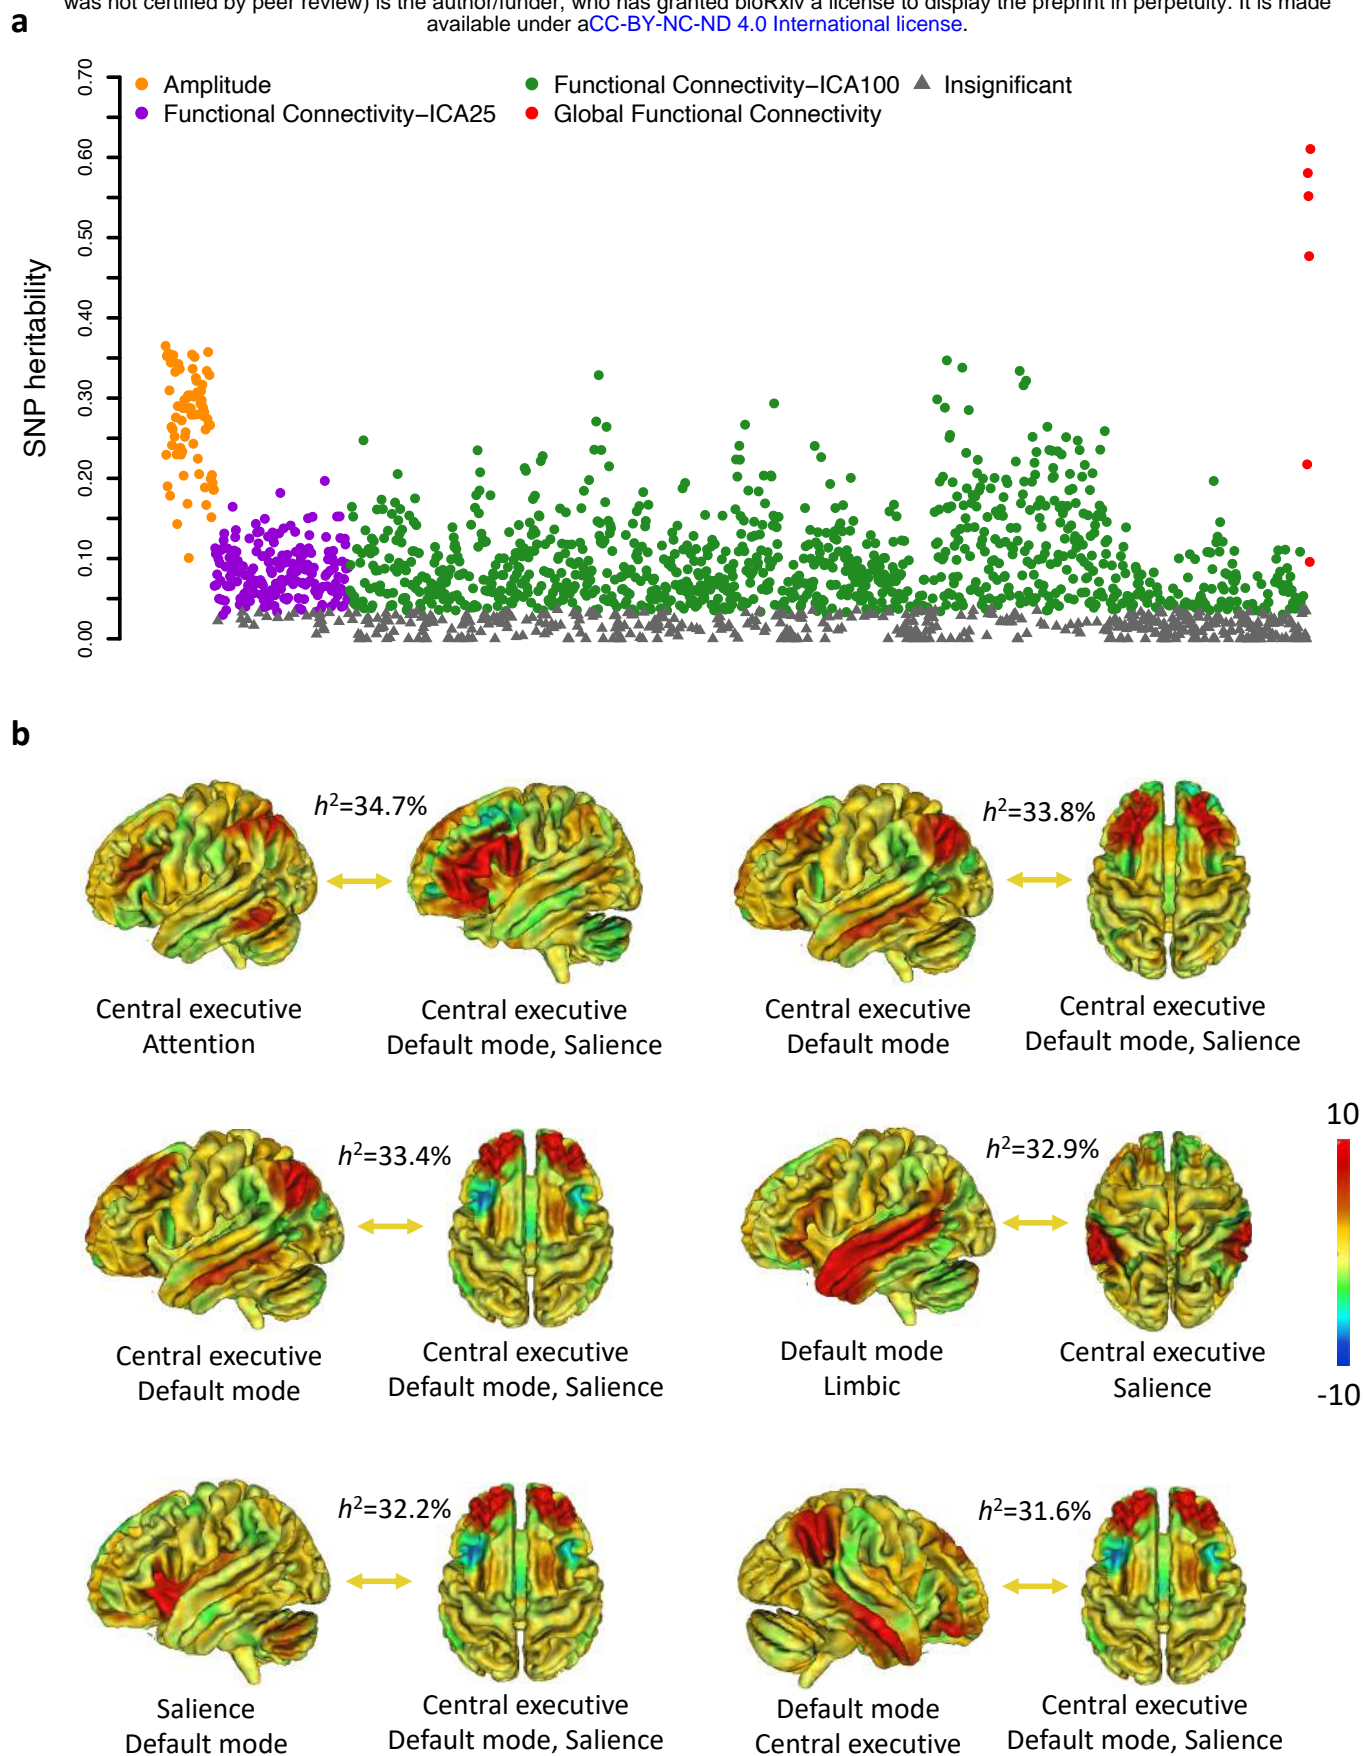

**Figure 1: SNP heritability estimates of intrinsic brain activity (n = 34,691 subjects).** **a)** The SNP heritability estimates of 1,777 intrinsic brain activity traits, including 76 amplitude traits, 1,695 pairwise functional connectivity traits, and 6 global functional connectivity measures. Two parcellations with different dimensionalities (25 and 100, respectively) were applied. **b)** The 6 pairwise functional connectivity traits that had heritability larger than 30%.

**a**

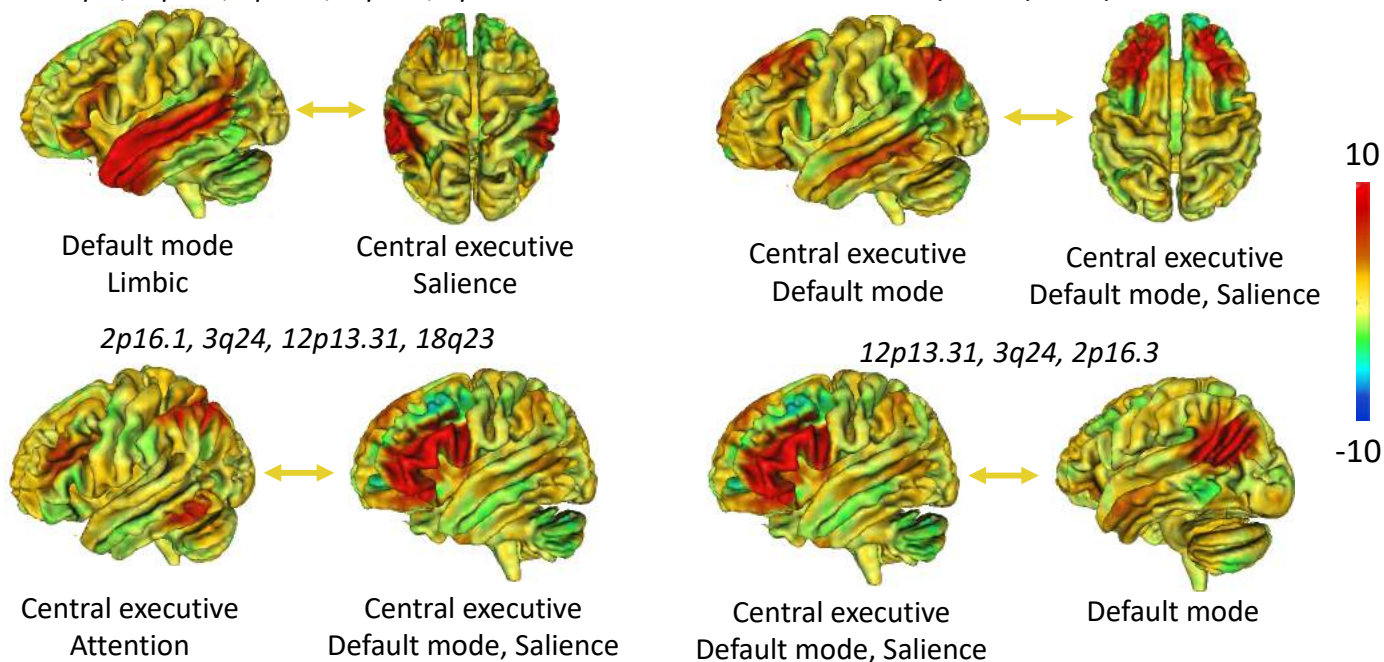

**b**

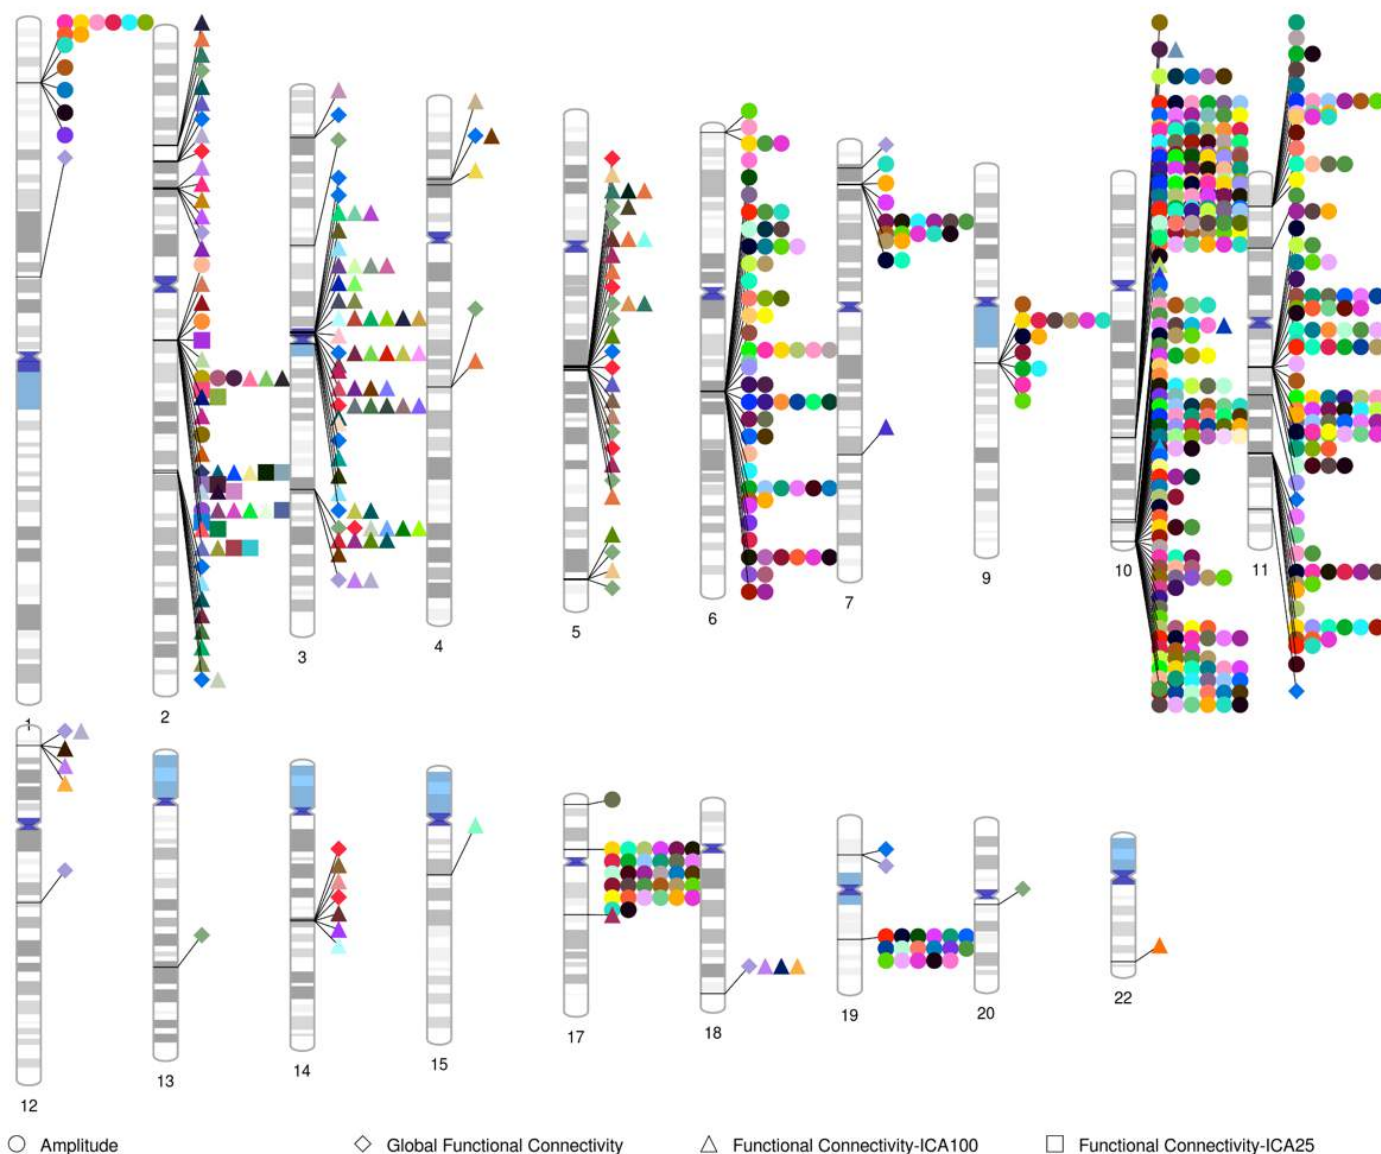

**Figure 2: The associated genetic loci of intrinsic brain activity (n = 34,691 subjects).** **a)** Selected pairwise functional connectivity traits that had multiple associated genetic loci. **b)** Ideogram of all loci influencing intrinsic brain activity.

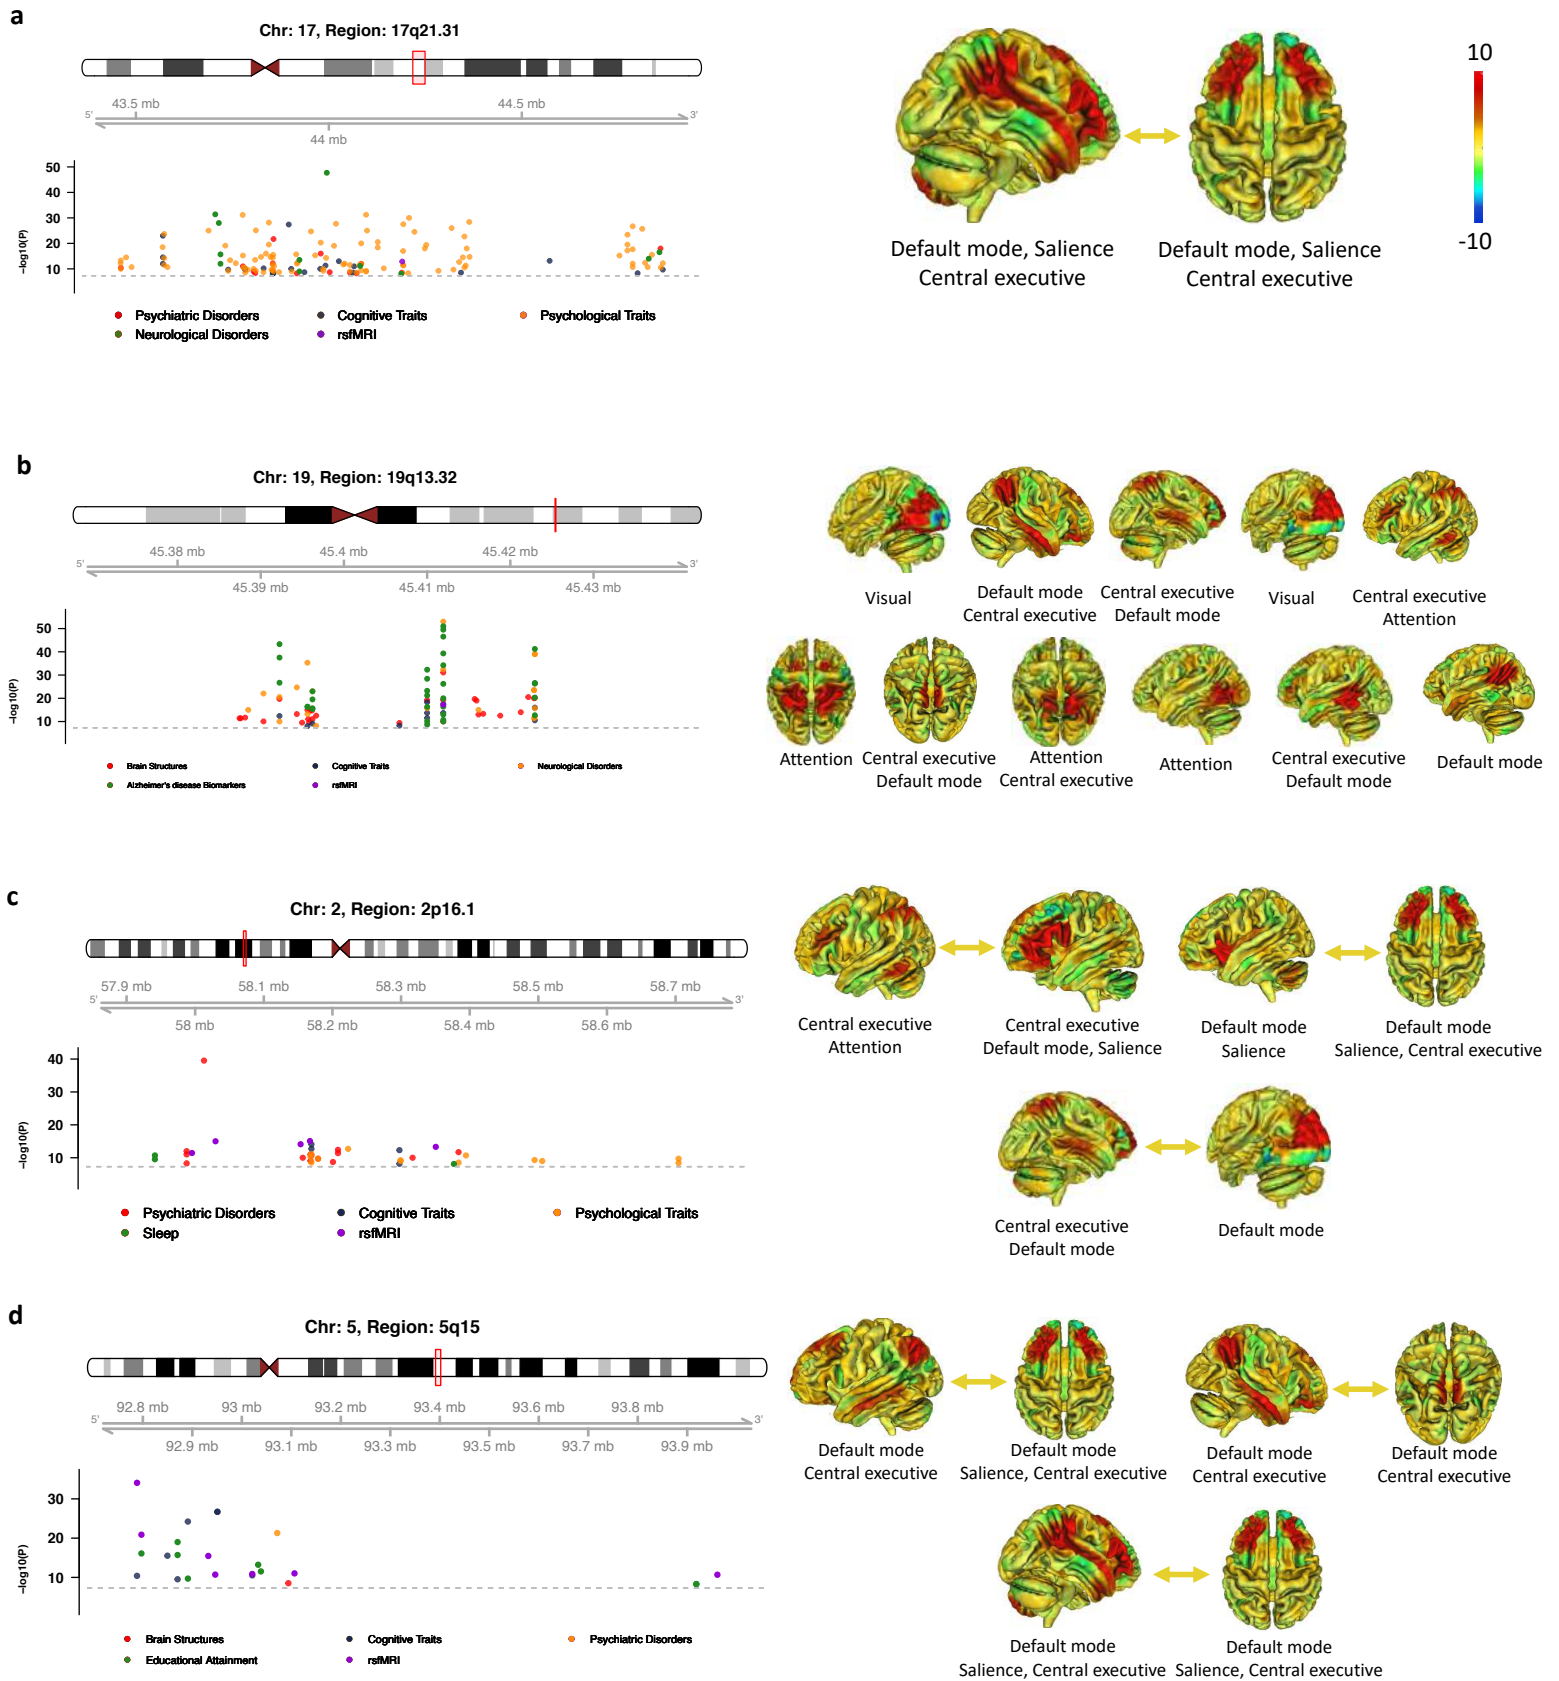

**Figure 3: The selected shared loci associated with both intrinsic brain activity and other brain-related complex traits and disorders.** We illustrate local colocalizations (left,  $LD\ r^2 \geq 0.6$ ) between intrinsic brain activity traits (right) associated variants ( $n = 34,691$  subjects) and previously reported associations of other traits on the NHGRI-EBI GWAS catalog (<https://www.ebi.ac.uk/gwas/>).

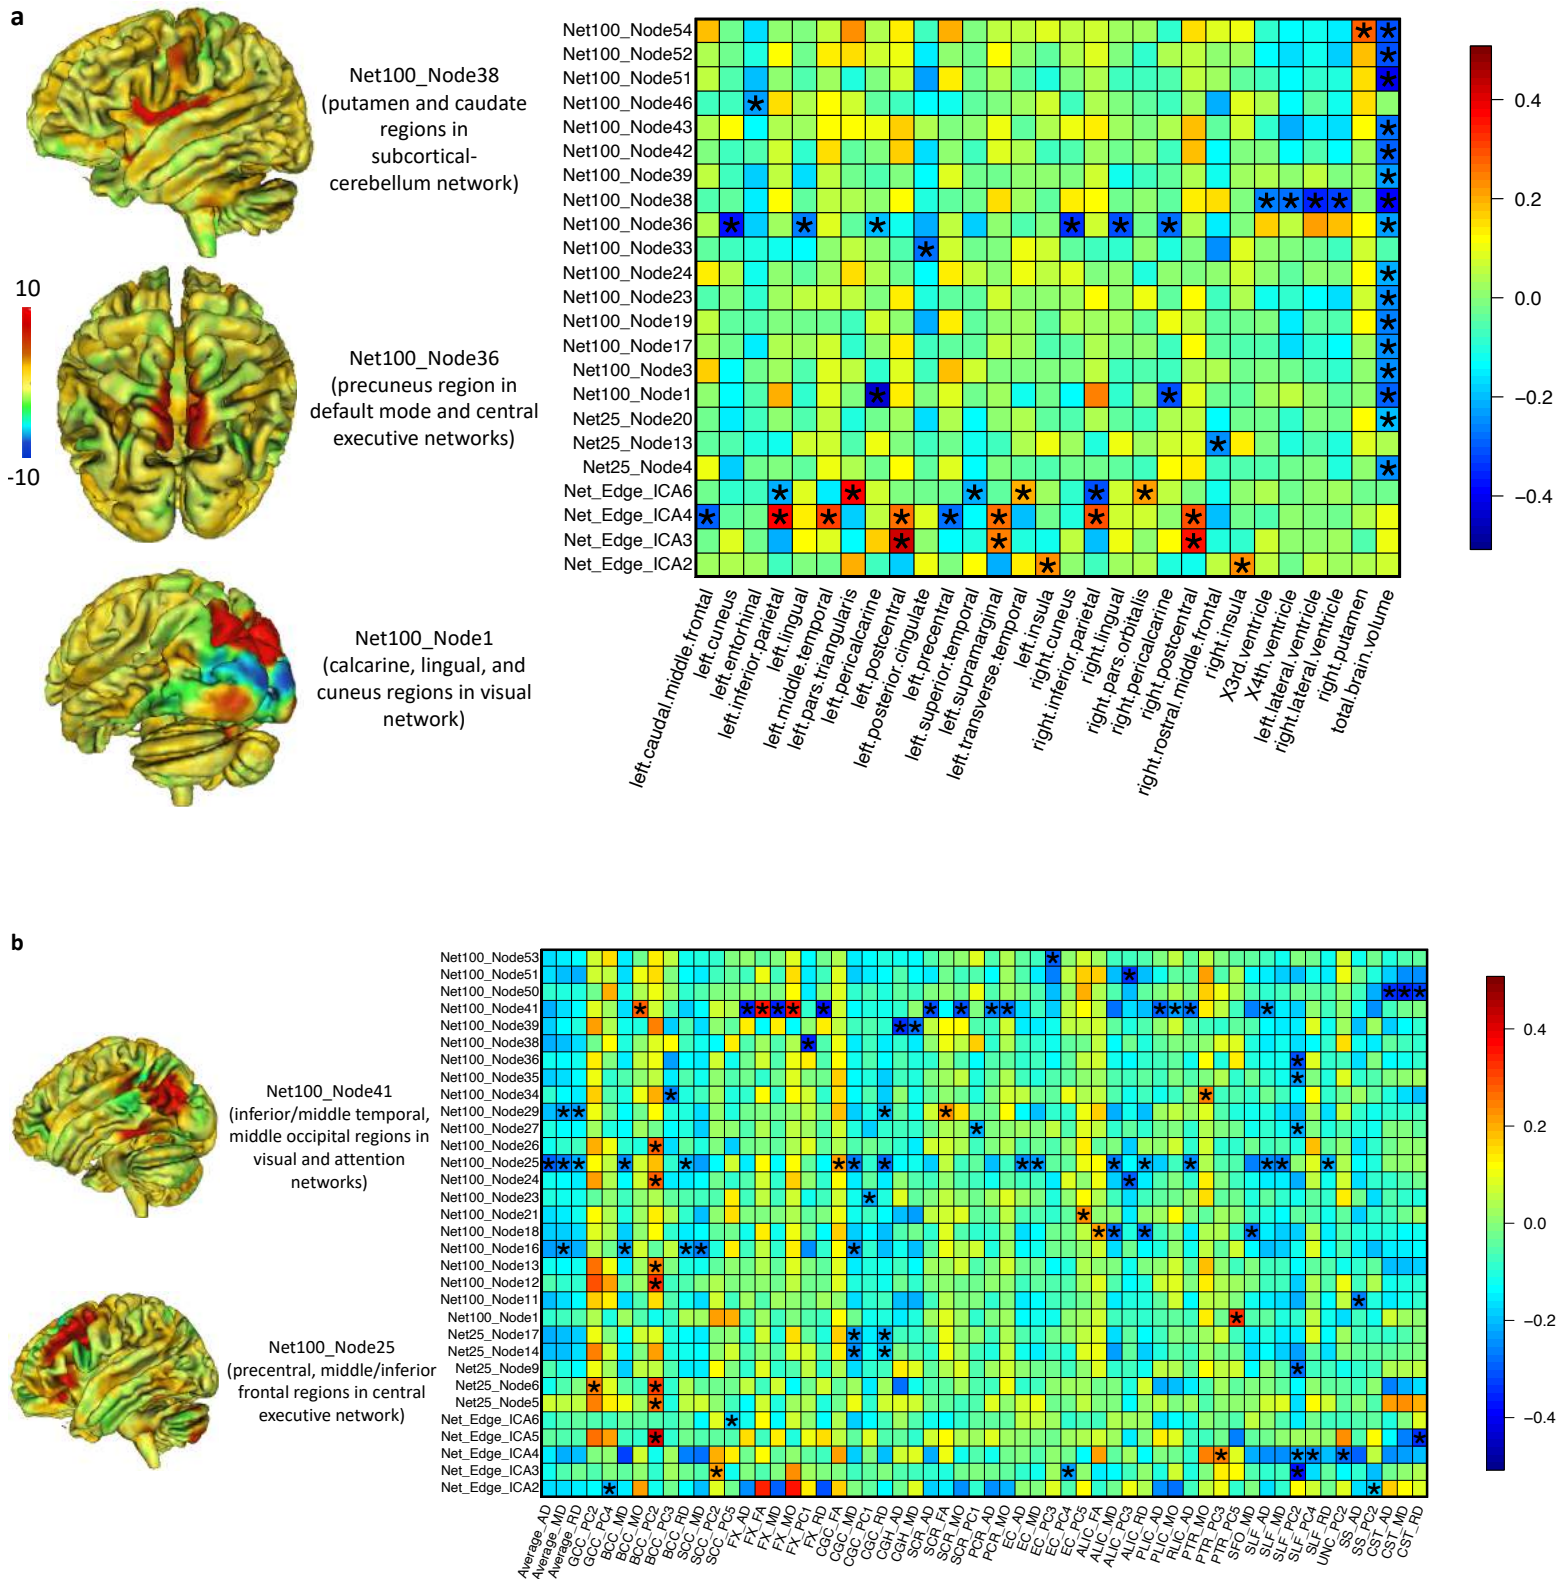

**Figure 4: Pairwise genetic correlations between intrinsic brain activity and brain structure (n = 34,691 subjects). a)** Genetic correlations between intrinsic brain activity traits and regional brain volumes. **b)** Genetic correlations between intrinsic brain activity traits and DTI traits of white matter microstructure. The x axis lists names of brain structural traits and y axis lists names of brain intrinsic brain activity traits. We adjusted for multiple testing by the Benjamini-Hochberg procedure at 0.05 significance level (82 × 315 tests), while significant pairs are labeled with stars.

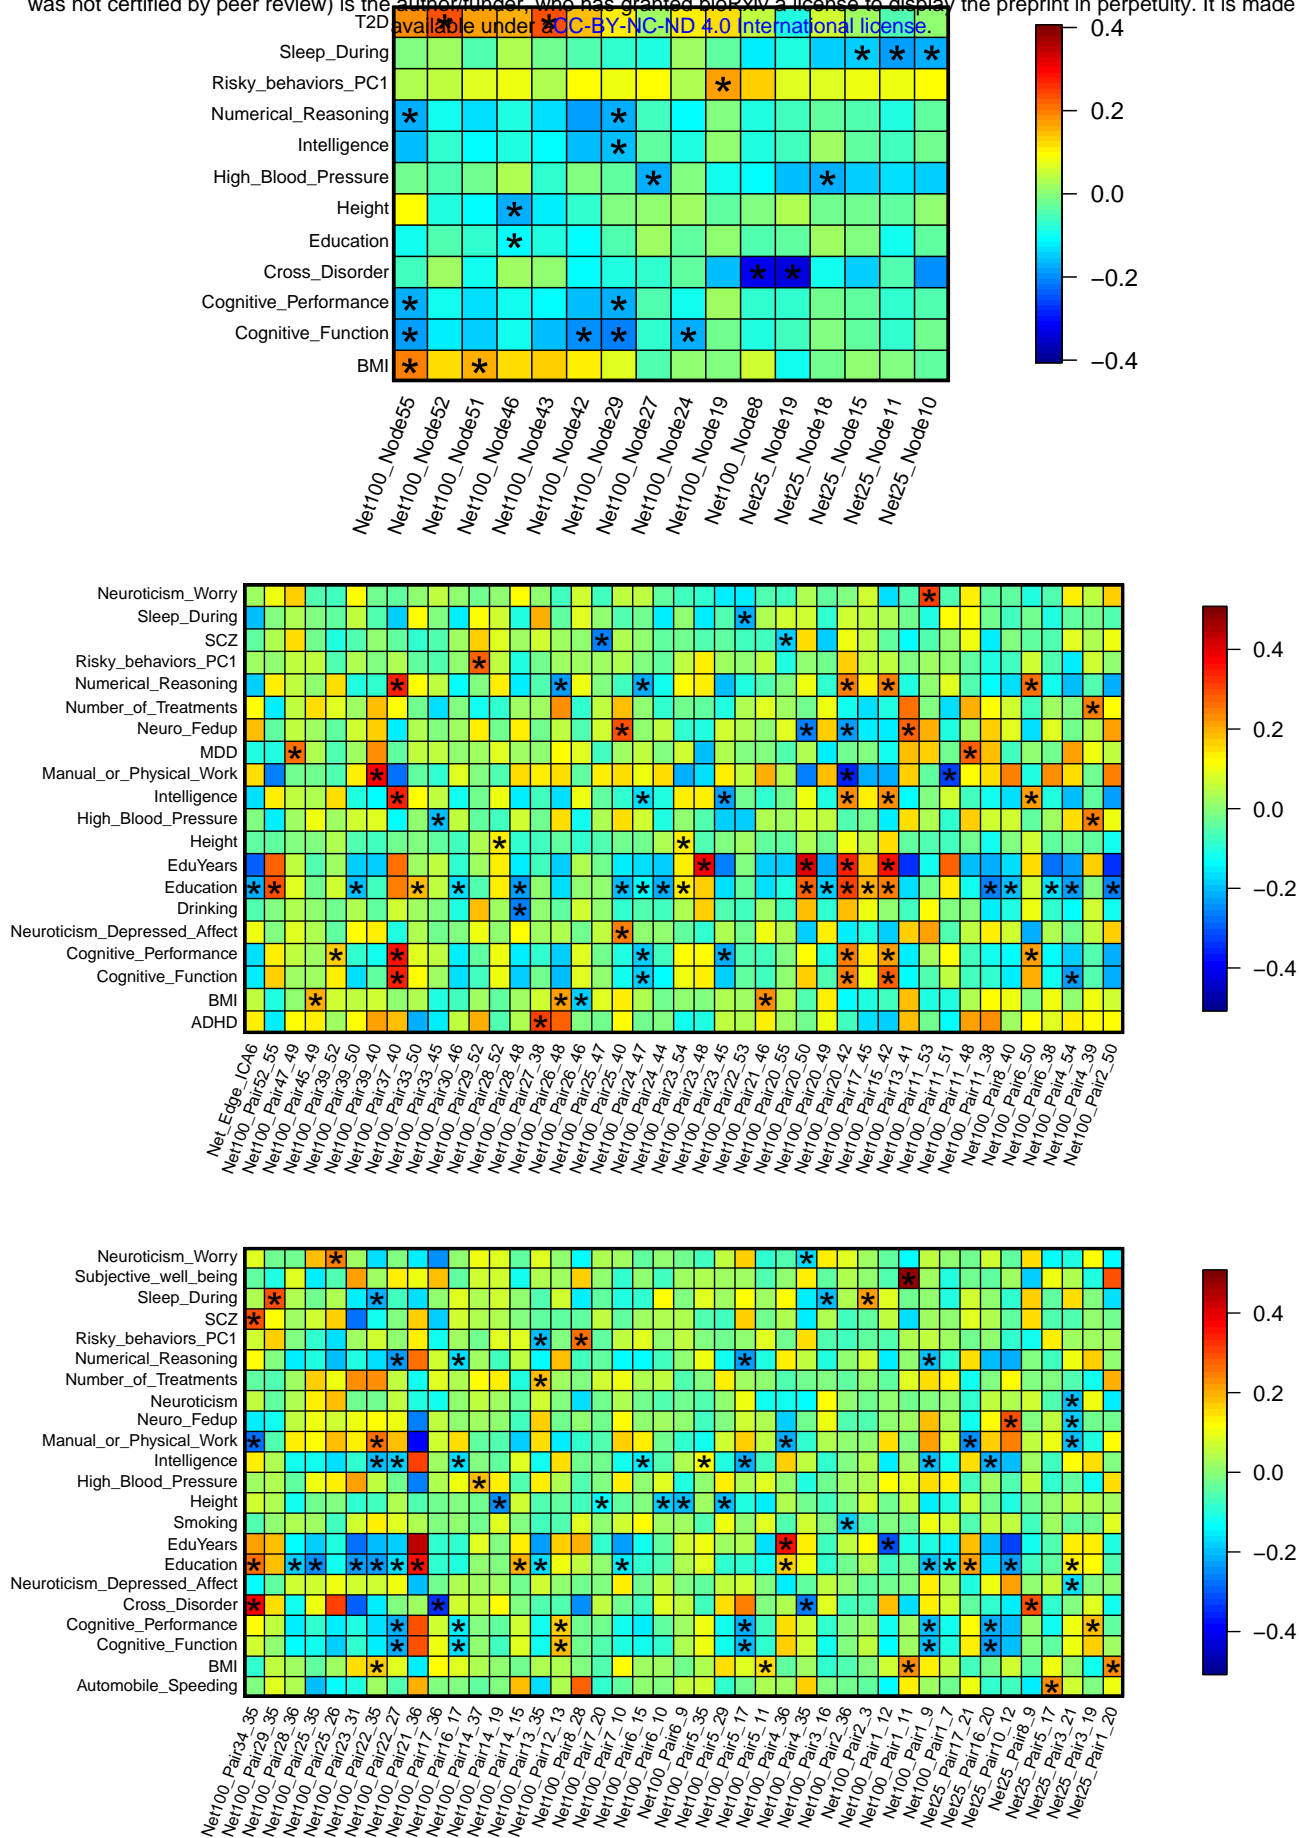

**Figure 5: Pairwise genetic correlations between intrinsic brain activity and other complex traits (n = 34,691 subjects).** We adjusted for multiple testing by the Benjamini-Hochberg procedure at 0.05 significance level ( $1,777 \times 30$  tests), while significant pairs are labeled with stars. The y axis lists names of brain structural traits and x axis lists names of other complex traits.
